# Supplementary material for: Hydrogen-bond-induced selectivity of a head-to-head photo-dimerisation of dialkynylanthracene – access to tetradentate Lewis acids
Source: Royal Society of Chemistry journal article supplement (doi:10.1039/d1sc02065j), 2021-01-01
Supplement: d1sc02065j1.pdf [file d1sc02065j1.pdf]

## Table of Contents

|                                                                         |     |
|-------------------------------------------------------------------------|-----|
| Photo-dimerisation of alkynylanthracenes <b>1</b> and <b>5</b>          | S2  |
| Photo-dimerisation of alkynylanthracenes <b>5</b> in different solvents | S3  |
| Thermal cycloreversion reactions                                        | S4  |
| NMR Spectroscopic Data                                                  | S5  |
| UV-VIS Absorption Spectra                                               | S17 |
| Crystallographic Data                                                   | S19 |
| References                                                              | S31 |

## Photo-dimerisation of alkynylantracenes **1** and **5**

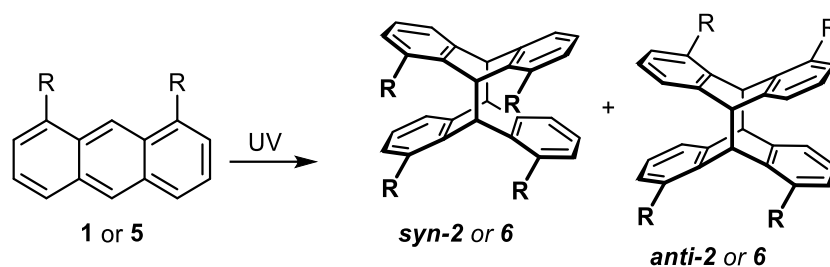

Scheme S1

**Table S1** NMR experiments for the photo-dimerisation of 1,8-diethynylantracene (**1**) in various deuterated solvents. The concentrations ( $\pm 0.02 \text{ mg mL}^{-1}$ ) of reactant **1** as well as the irradiation times and the percentages ( $\pm 1\%$ ) of isomers *syn*-**2** and *anti*-**2** are listed. Data for **5**  $\rightarrow$  *syn*-**6**/*anti*-**6** are listed in Table 1 (main text) and Table S2.

| solvent                     | $c \text{ [mg mL}^{-1}\text{]}$ | $t \text{ [h]}$ | <i>syn</i> - <b>2</b> [%] | <i>anti</i> - <b>2</b> [%] |
|-----------------------------|---------------------------------|-----------------|---------------------------|----------------------------|
| $\text{C}_6\text{D}_6$      | 3.33                            | 3               | 21                        | 79                         |
| toluene- $d_8$              | 3.33                            | 3               | 21                        | 79                         |
| $\text{CDCl}_3$             | 3.33                            | 3               | 21                        | 79                         |
| $\text{CD}_2\text{Cl}_2$    | 3.33                            | 3               | 22                        | 78                         |
| MeOD                        | 3.33                            | 3               | 22                        | 78                         |
| THF- $d_8$                  | 3.33                            | 7               | 21                        | 79                         |
| pyridine- $d_5$             | 3.33                            | 7               | 25                        | 75                         |
| acetone- $d_6$              | 3.33                            | 3               | 26                        | 74                         |
| $\text{CD}_3\text{CN}$      | 3.33                            | 3               | 28                        | 72                         |
| $\text{DMSO-}d_6$           | 3.33                            | 15              | 33                        | 67                         |
| methylcyclohexane- $d_{14}$ | 3.33                            | 5               | 17                        | 83                         |
| DMF- $d_7$                  | 0.66                            | 3               | 31                        | 69                         |
| DMF- $d_7$                  | 1.00                            | 7               | 31                        | 69                         |
| DMF- $d_7$                  | 2.00                            | 7               | 31                        | 69                         |
| DMF- $d_7$                  | 3.33                            | 15              | 31                        | 69                         |
| DMF- $d_7$                  | 4.00                            | 12              | 30                        | 30                         |
| DMF- $d_7$                  | 10.0                            | 14              | 28                        | 72                         |
| DMF- $d_7$                  | 20.0                            | 14              | 26                        | 74                         |
| DMF- $d_7$                  | 40.0                            | 19              | 23                        | 77                         |

## Photo-dimerisation of alkynylanthracenes **5** in different solvents

**Table S2** NMR experiments for the photo-dimerization of dialkynylanthracene **5** in various deuterated solvents. Concentrations ( $\pm 0.02 \text{ mg mL}^{-1}$ ) of reactant **5** as well as irradiation times and fractions ( $\pm 1\%$ ) of isomers *syn-6* and *anti-6* are listed. In addition to Table 1 in the main text, solvent properties are listed here: dielectric constant  $\epsilon$ , dipole moment  $\mu$  and relative polarity *RP*. Plots of these parameters against the fraction of *anti-6* are provided below.

| solvent                                   | <i>c</i><br>[mg mL <sup>-1</sup> ] | <i>t</i><br>[h] | <i>syn-6</i><br>[%] | <i>anti-6</i><br>[%] | $\epsilon$ | $\mu$<br>[D] | <i>RP</i> <sup>a</sup> |
|-------------------------------------------|------------------------------------|-----------------|---------------------|----------------------|------------|--------------|------------------------|
| DMSO- <i>d</i> <sub>6</sub>               | 4.00                               | 15              | 8                   | 92                   | 46.48      | 13           | 0.444                  |
| DMF- <i>d</i> <sub>7</sub>                | 4.00                               | 9               | 8                   | 92                   | 37         | 12.88        | 0.386                  |
| CD <sub>3</sub> CN                        | 4.00                               | 9               | 19                  | 81                   | 37.5       | 11.48        | 0.46                   |
| acetone- <i>d</i> <sub>6</sub>            | 4.00                               | 3               | 16                  | 84                   | 20.7       | 9.54         | 0.355                  |
| THF- <i>d</i> <sub>8</sub>                | 4.00                               | 9               | 13                  | 87                   | 7.58       | 5.84         | 0.207                  |
| MeOD                                      | 4.00                               | 9               | 11                  | 89                   | 32.7       | 5.67         | 0.762                  |
| CD <sub>2</sub> Cl <sub>2</sub>           | 4.00                               | 9               | 47                  | 53                   | 8.93       | 5.17         | 0.309                  |
| CDCl <sub>3</sub>                         | 4.00                               | 9               | 47                  | 53                   | 4.81       | 3.84         | 0.259                  |
| C <sub>6</sub> D <sub>6</sub>             | 4.00                               | 3               | 51                  | 49                   | 2.28       | 0            | 0.111                  |
| cyclohexane- <i>d</i> <sub>12</sub>       | 4.00                               | 9               | 85                  | 15                   | 2.02       | 0            | 0.006                  |
| cyclohexane- <i>d</i> <sub>12</sub>       | 20.0                               | 25              | 85                  | 15                   | 2.02       | 0            | 0.006                  |
| methylcyclohexane- <i>d</i> <sub>14</sub> | 4.00                               | 9               | 84                  | 16                   | 2.02       | 0            |                        |
| methylcyclohexane- <i>d</i> <sub>14</sub> | 20.0                               | 25              | 84                  | 16                   | 2.02       | 0            |                        |

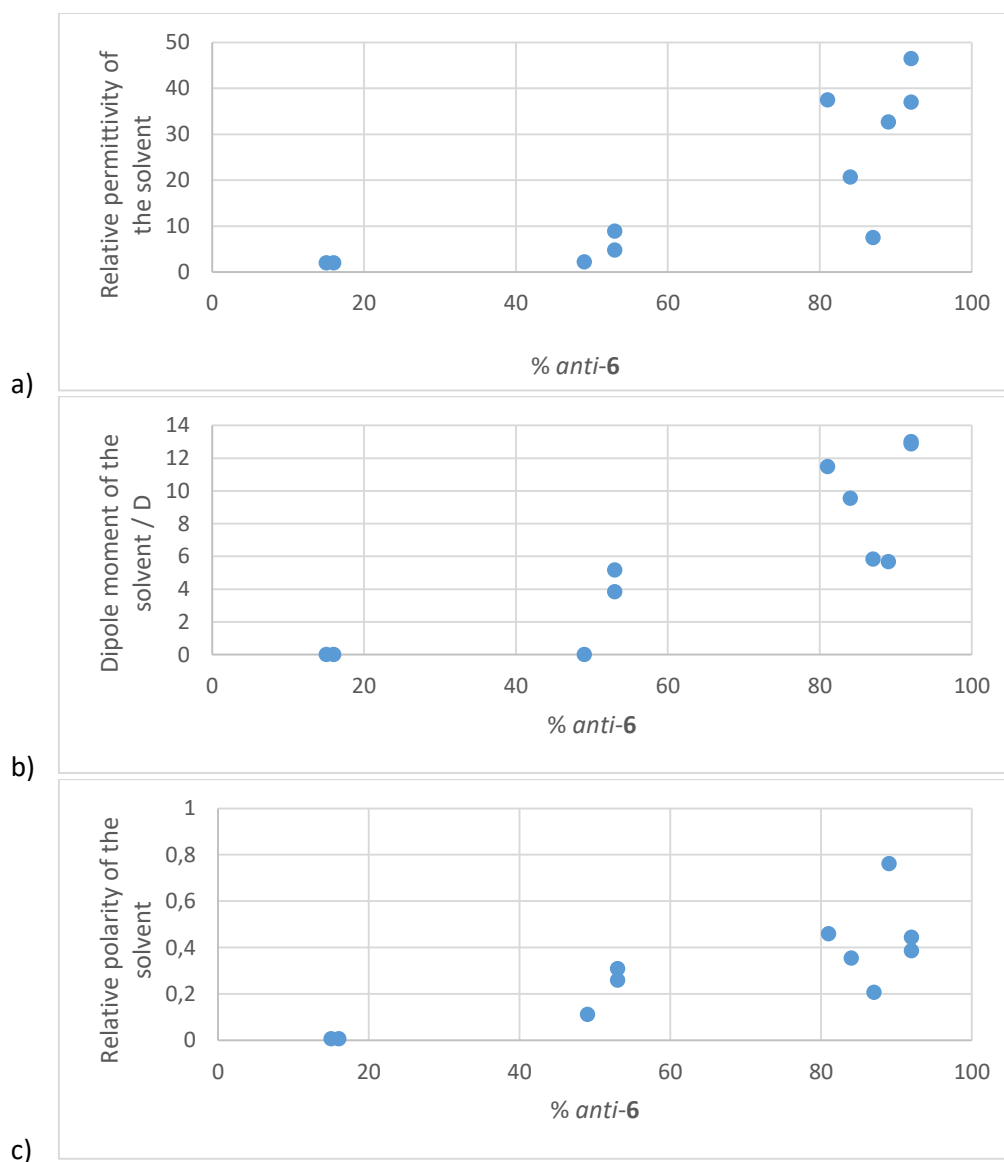

## Thermal cycloreversion reactions

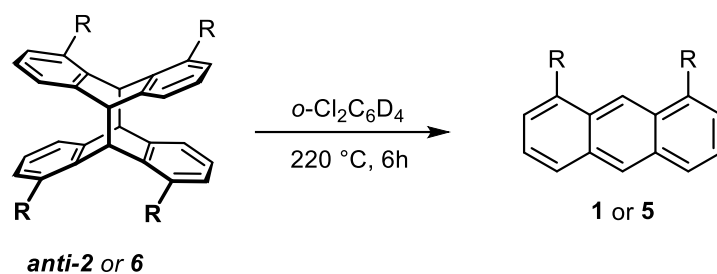

Scheme S2

Table S3 <sup>1</sup>H NMR spectroscopic shifts of compounds **1**, *anti-2*, **5** and *anti-6* in *o*-C<sub>6</sub>D<sub>4</sub>Cl<sub>2</sub> at 298 K.<sup>[a]</sup>

|                 | <b>1</b> | <i>anti-2</i> | <b>5</b>  | <i>anti-6</i> <sup>[b]</sup> |
|-----------------|----------|---------------|-----------|------------------------------|
| H9              | 9.47 (s) | 5.88 (d)      | 9.46 (s)  | n.a.                         |
| H10             | 8.21 (s) | 4.71 (d)      | 8.20 (s)  | n.a.                         |
| H4/H5           | 7.83 (d) | 7.11 (d)      | 7.81 (d)  | n.a.                         |
| H2/H7           | 7.68 (d) | 6.96 (d)      | 7.58 (d)  | n.a.                         |
| H3/H6           | 7.28 (t) | 6.71 (t)      | 7.29 (dd) | n.a.                         |
| OH              | –        | –             | 3.85 (bs) | n.a.                         |
| CH <sub>3</sub> | –        | –             | 1.76 (s)  | n.a.                         |
| C≡CH            | 3.59 (s) | 3.42 (s)      | –         | –                            |

[a] For NMR assignments see Scheme 6 (main text). [b] n.a.: not assigned (due to poor solubility).

## NMR Spectroscopic Data

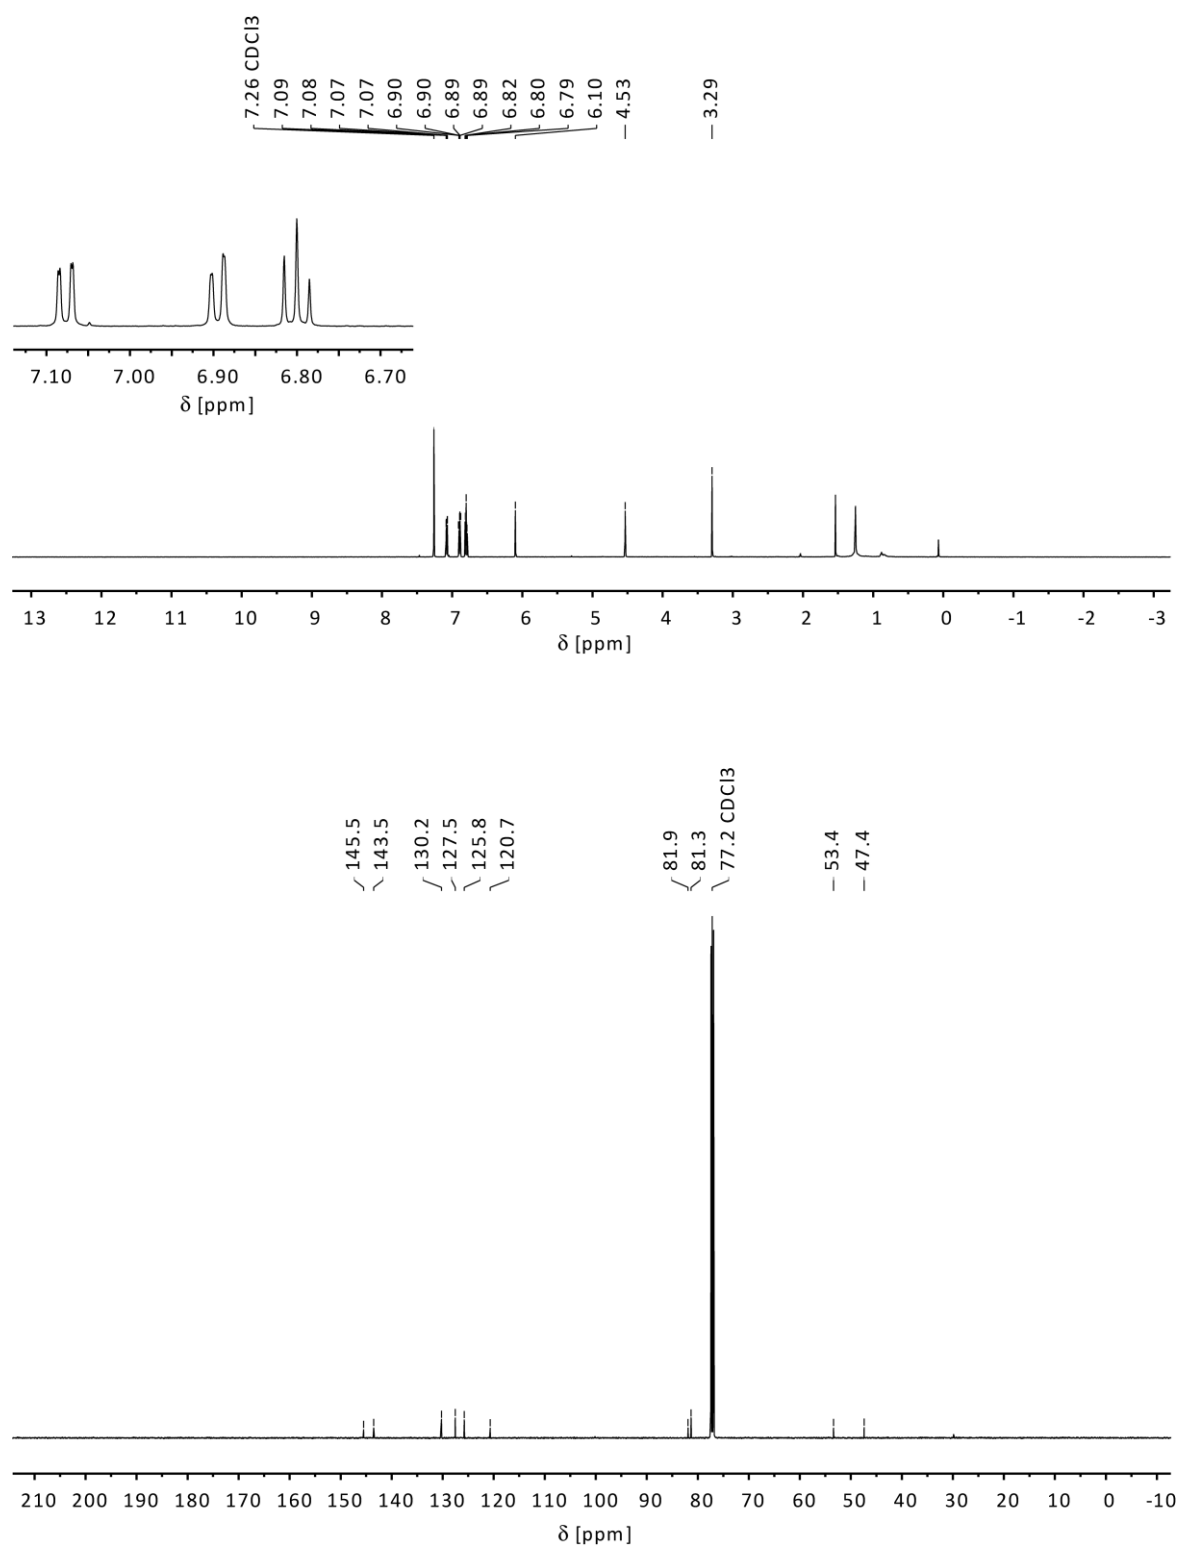

Fig. S1 NMR spectra,  $^1\text{H}$  NMR (above),  $^{13}\text{C}\{^1\text{H}\}$  NMR (below), of compound *syn-2*.

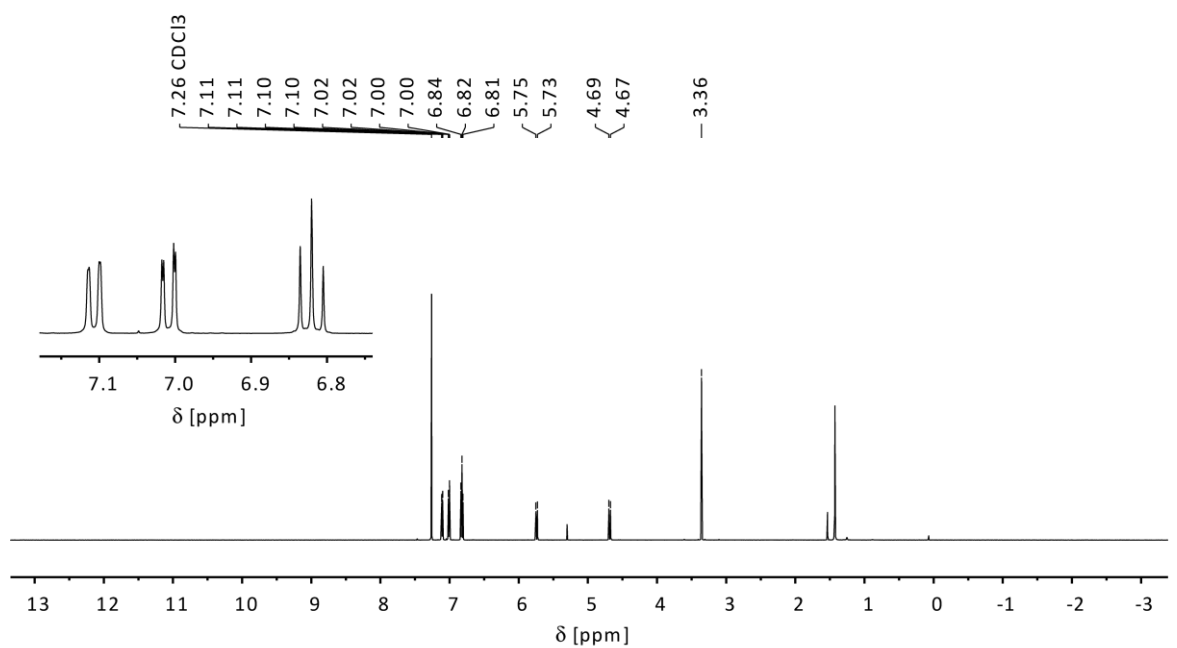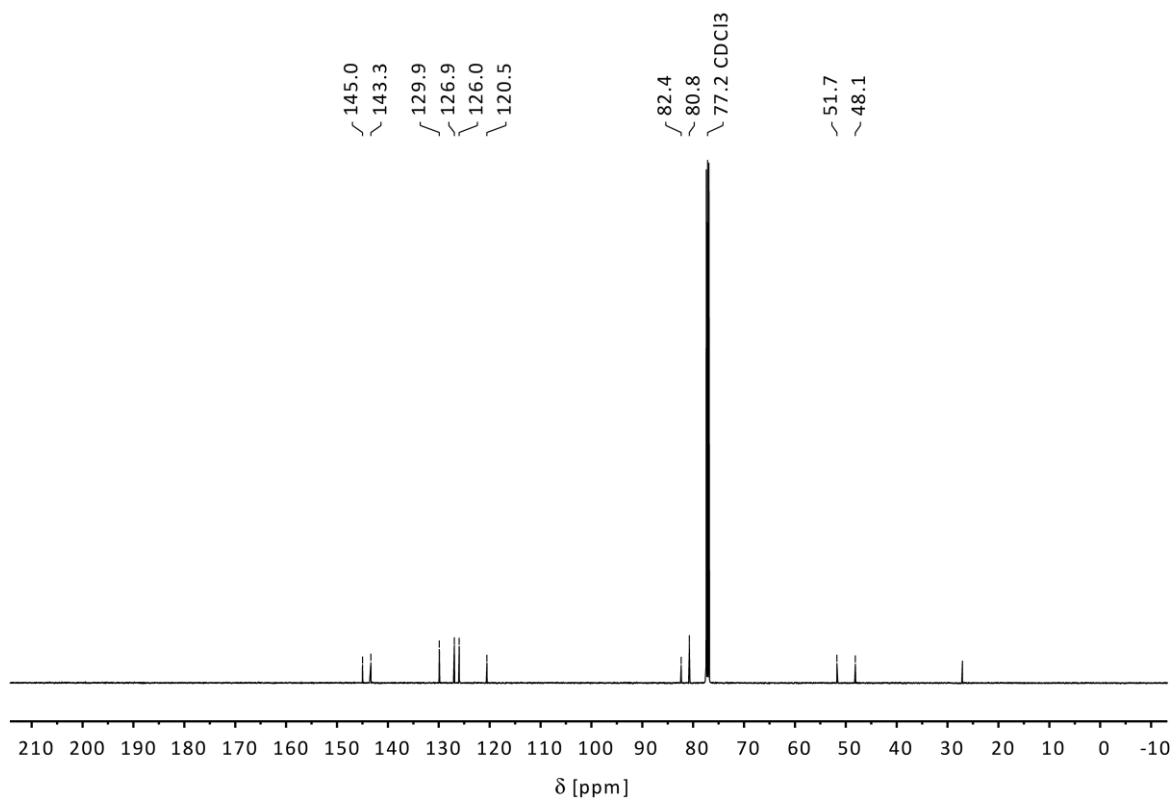

Fig. S2 NMR spectra,  $^1\text{H}$  NMR (above),  $^{13}\text{C}\{^1\text{H}\}$  NMR (below), of compound *anti-2*.

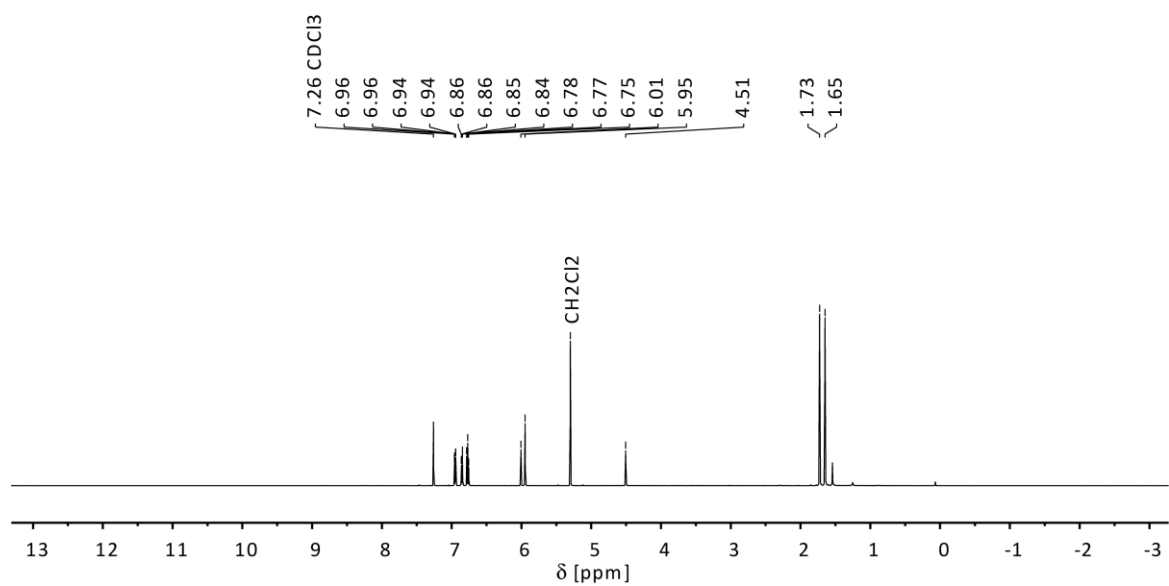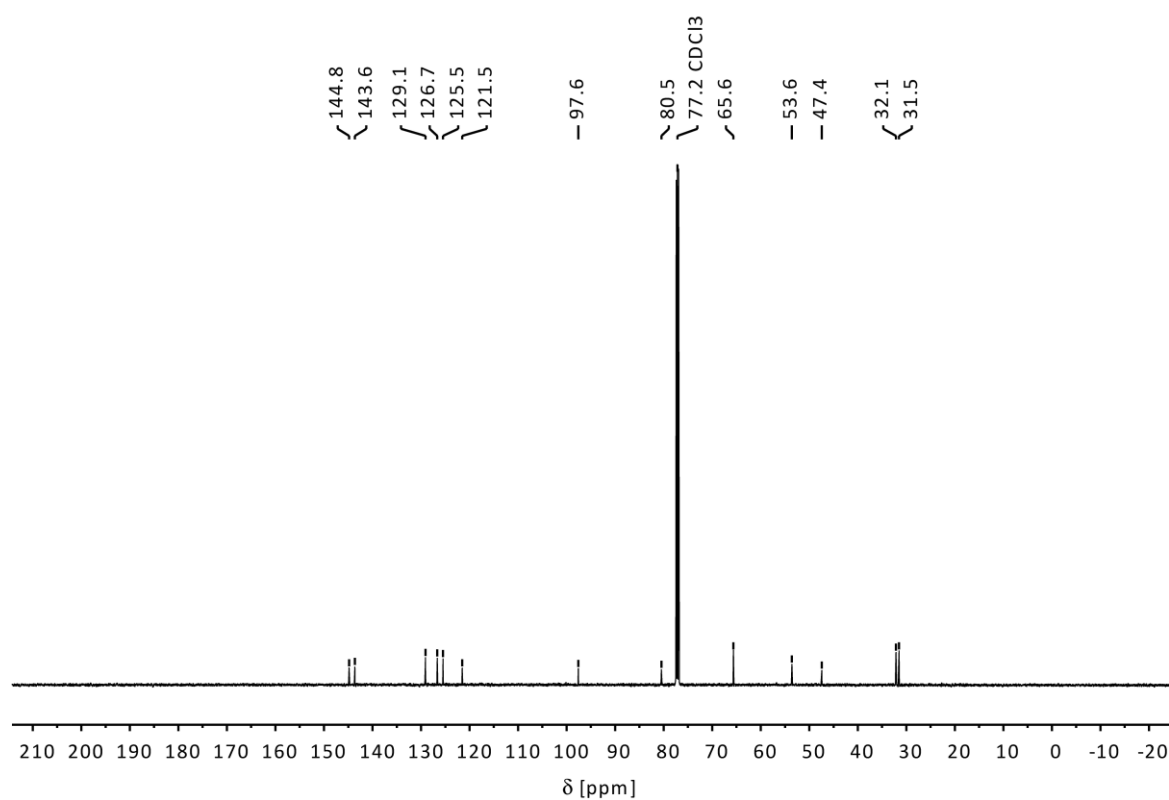

**Fig. S3** NMR spectra,  $^1\text{H}$  NMR (above),  $^{13}\text{C}\{^1\text{H}\}$  NMR (below), of compound *syn-6*.

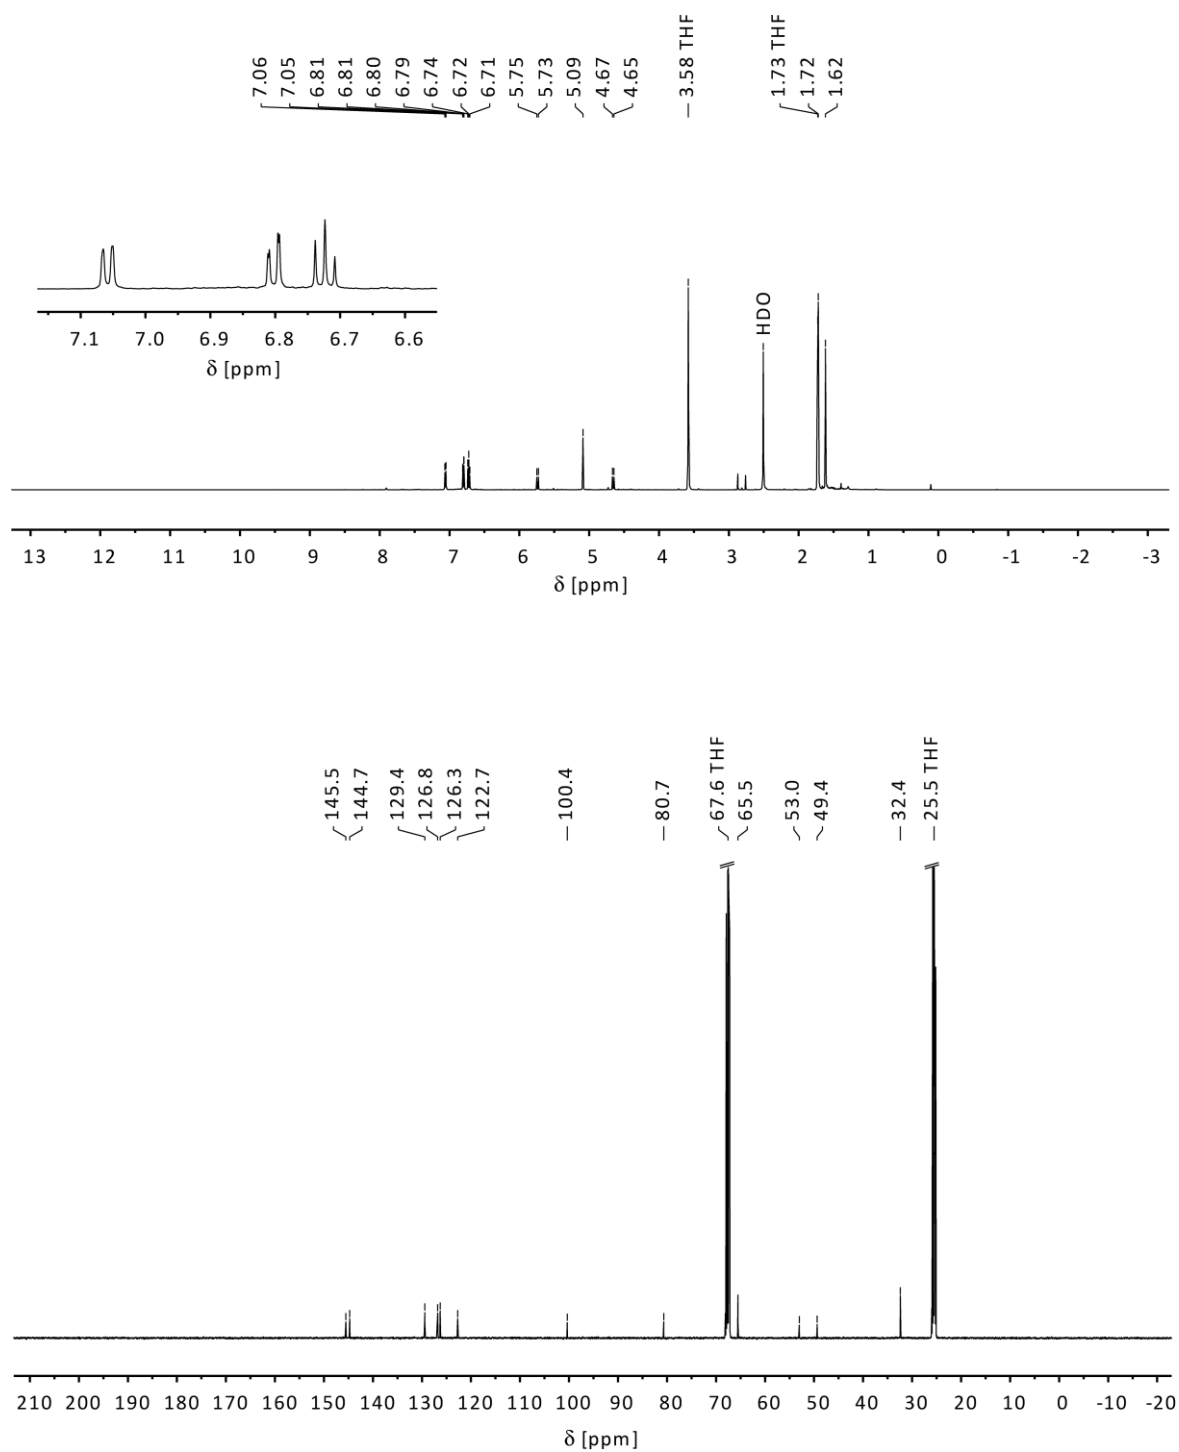

Fig. S4 NMR spectra,  $^1\text{H}$  NMR (above),  $^{13}\text{C}\{^1\text{H}\}$  NMR (below), of compound *anti-6*.



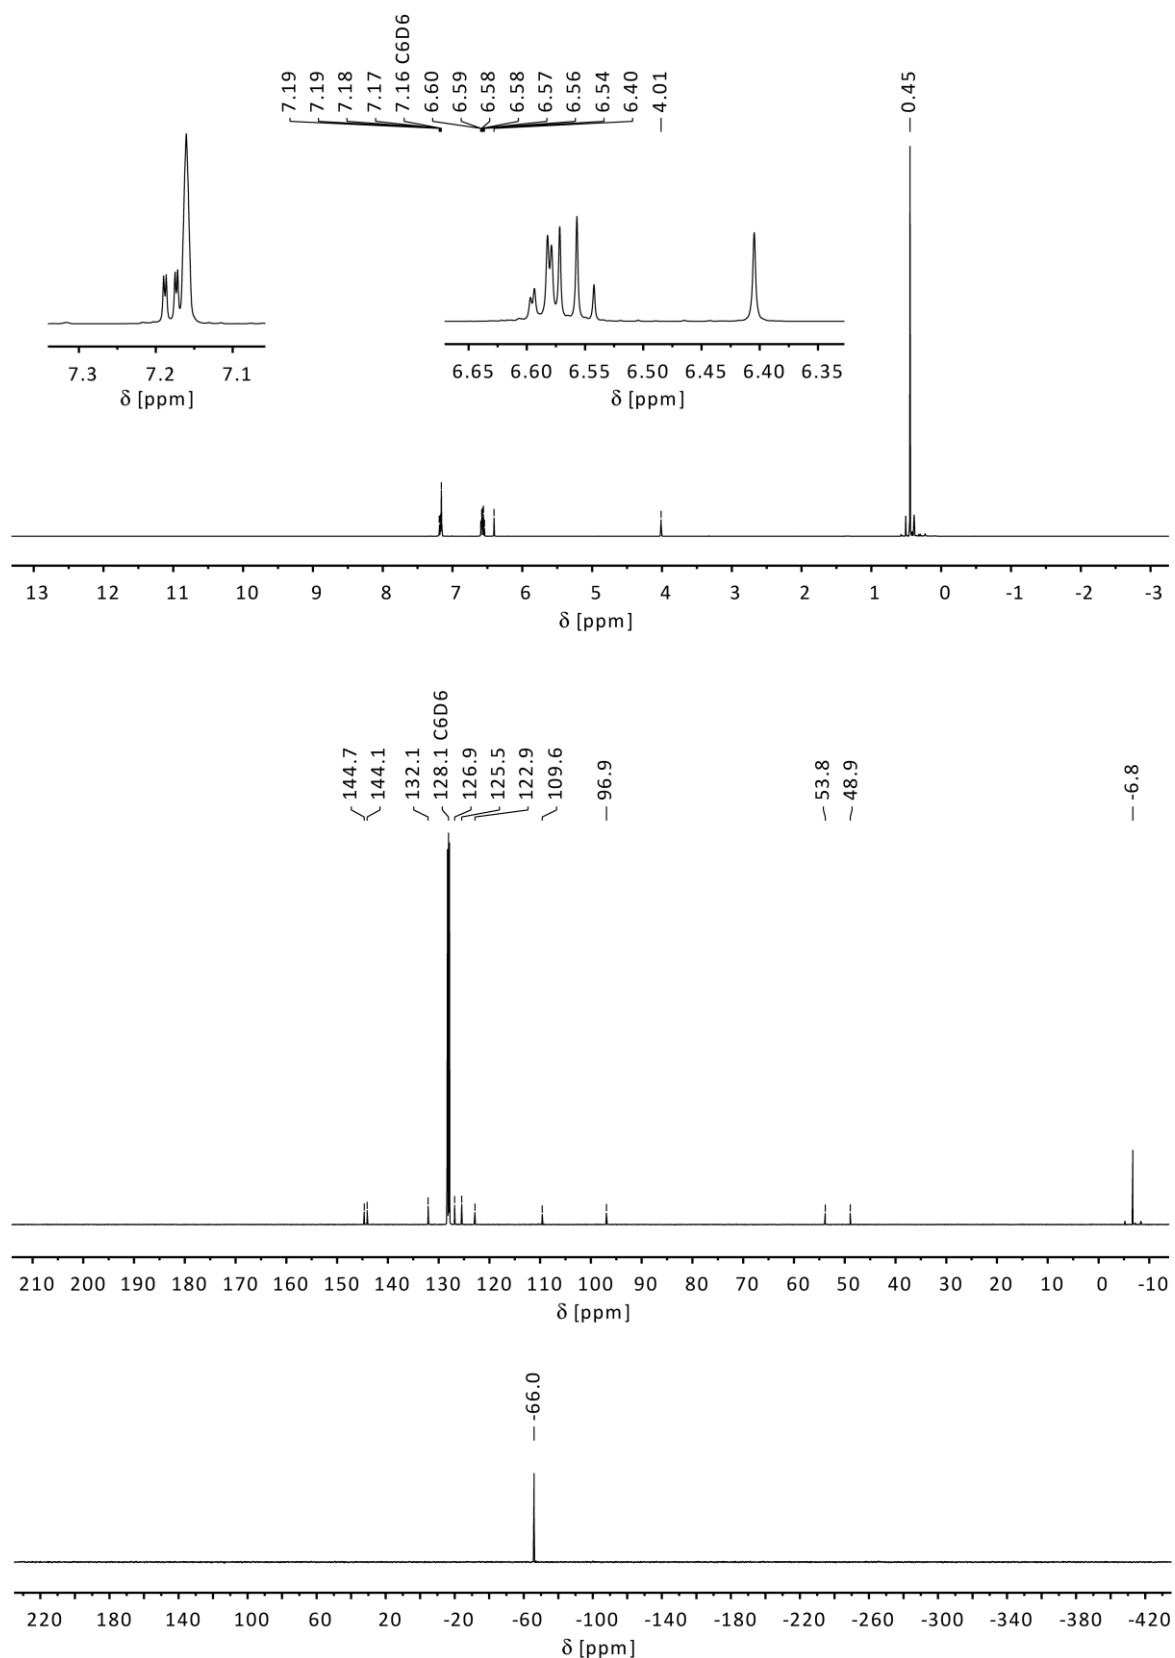

Fig. S5 NMR spectra,  $^1\text{H}$  NMR (above),  $^{13}\text{C}\{^1\text{H}\}$  NMR (centre),  $^{119}\text{Sn}\{^1\text{H}\}$  NMR (below), of compound 7.

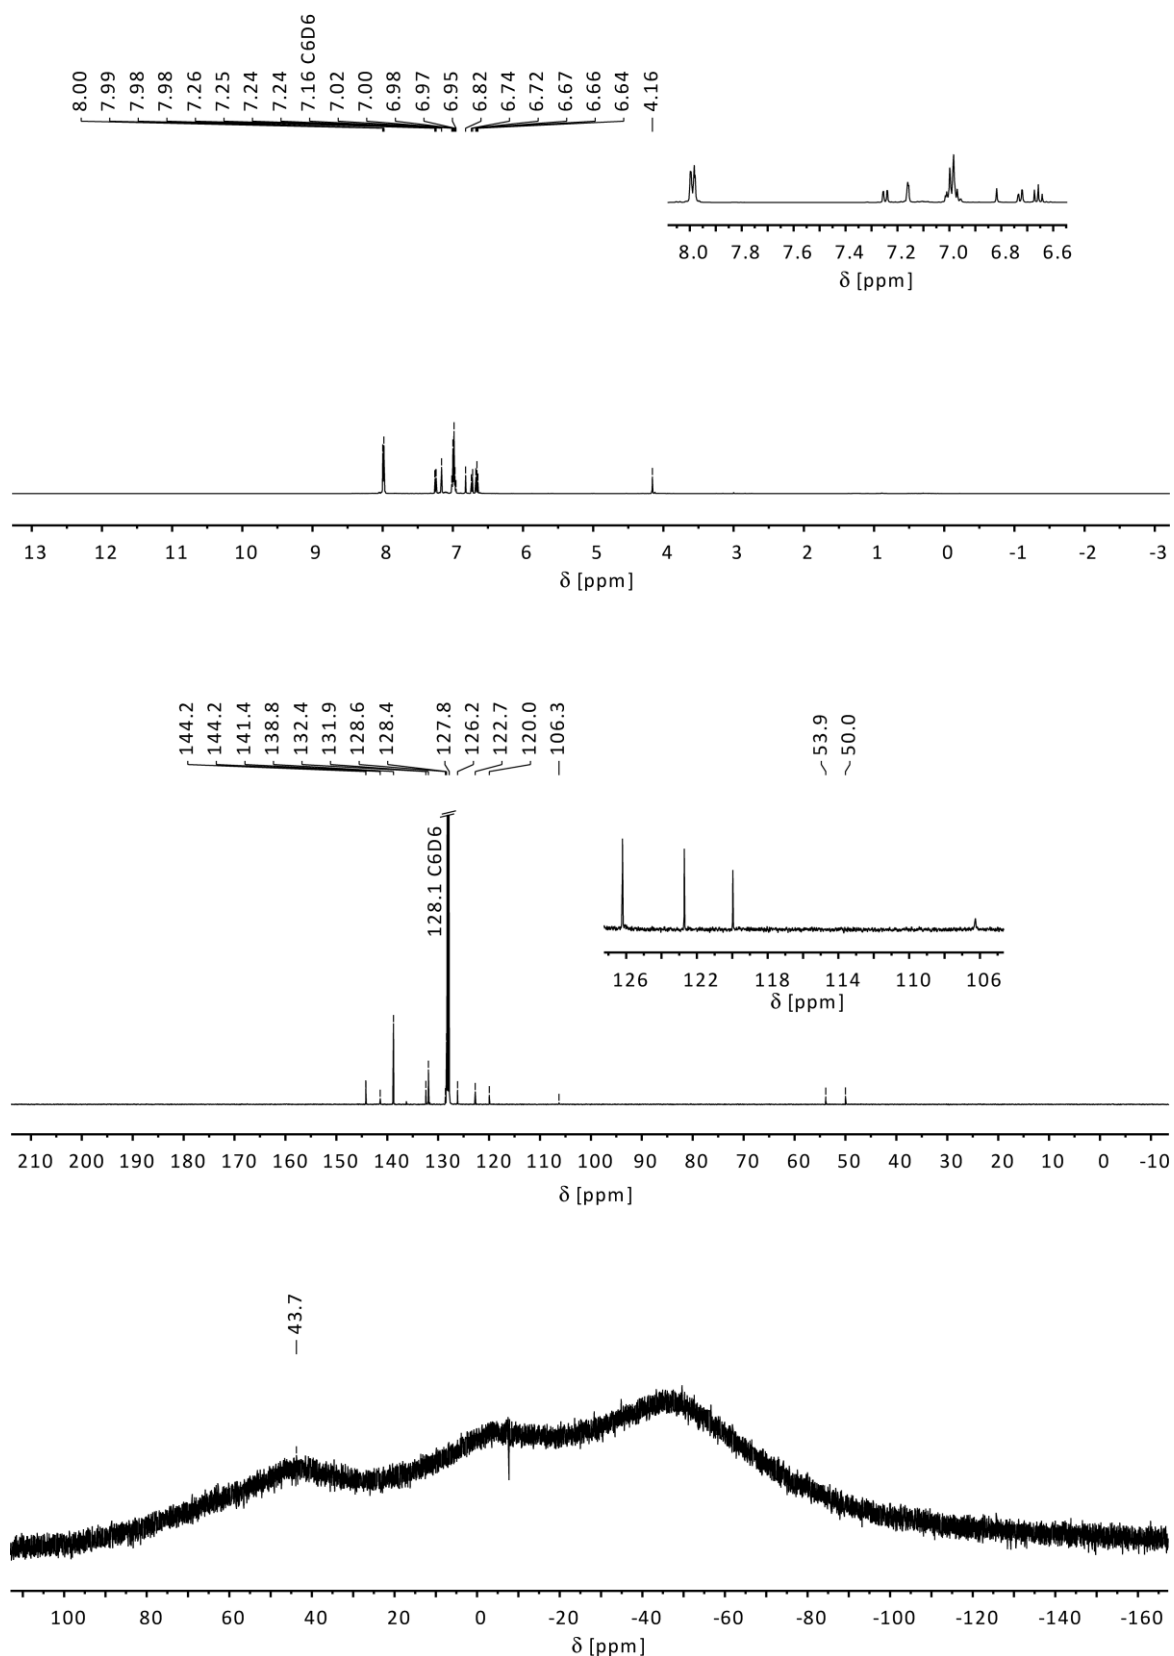

**Fig. S6** NMR spectra,  $^1\text{H}$  NMR (above),  $^{13}\text{C}\{^1\text{H}\}$  NMR (centre),  $^{11}\text{B}\{^1\text{H}\}$  NMR (below), of compound **8**.

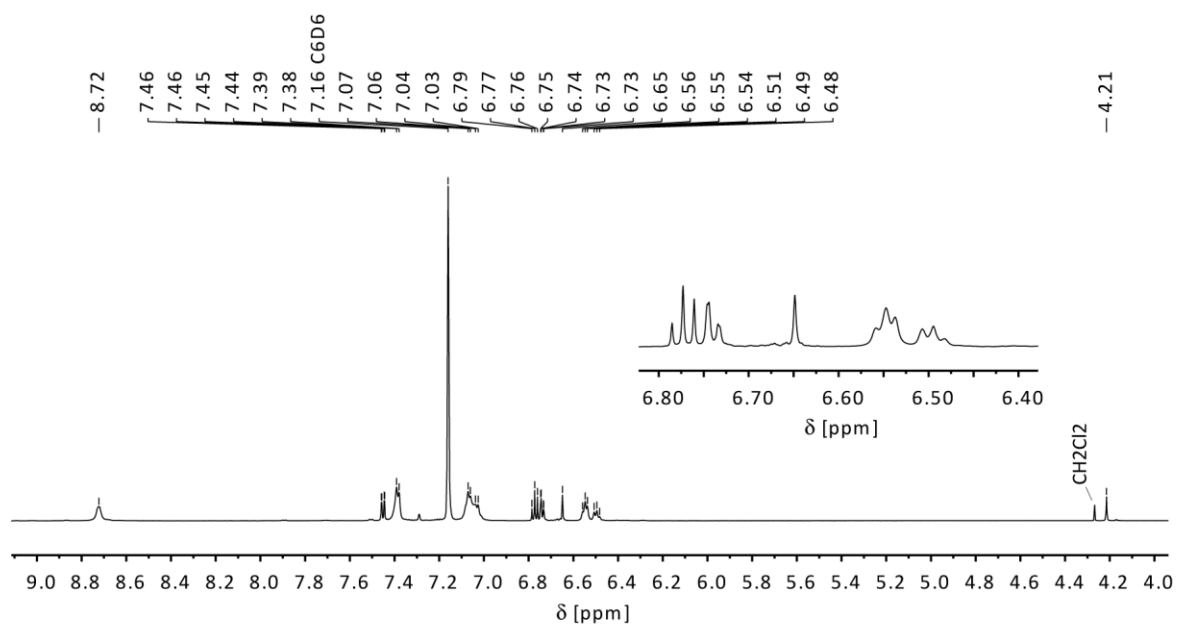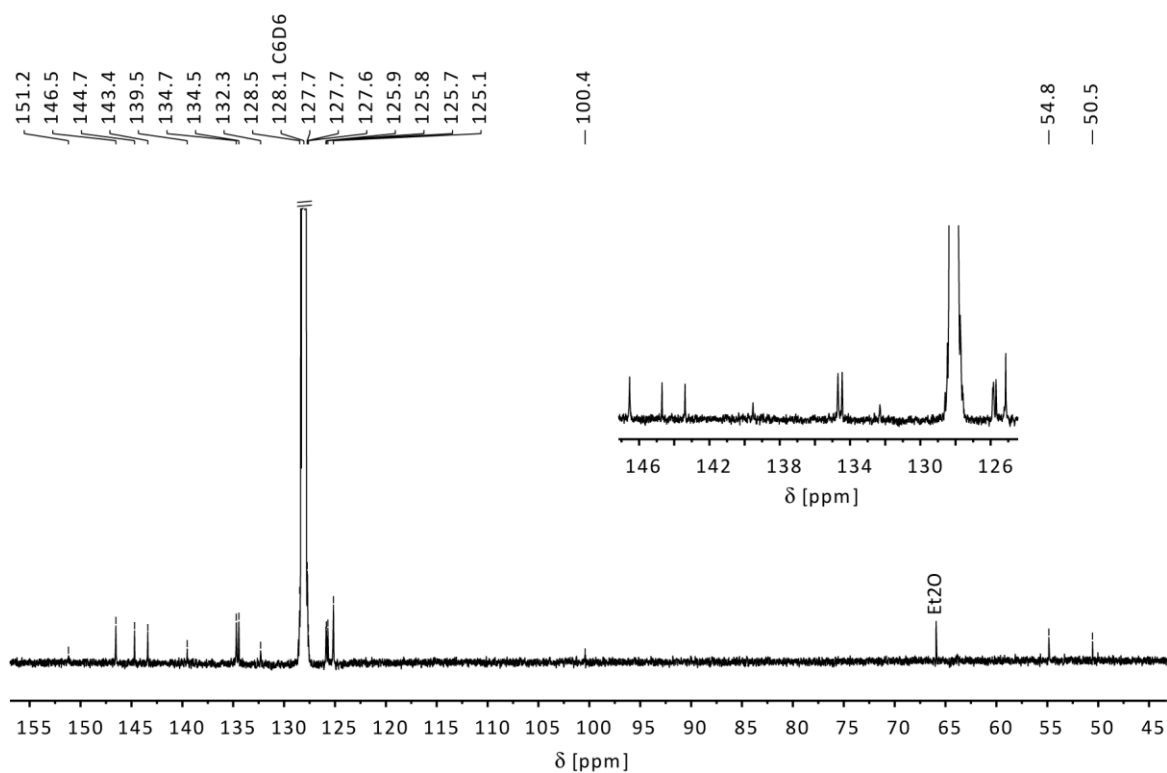

**Fig. S7** NMR spectra,  $^1\text{H}$  NMR (above),  $^{13}\text{C}\{^1\text{H}\}$  NMR (below), of compound **9**.

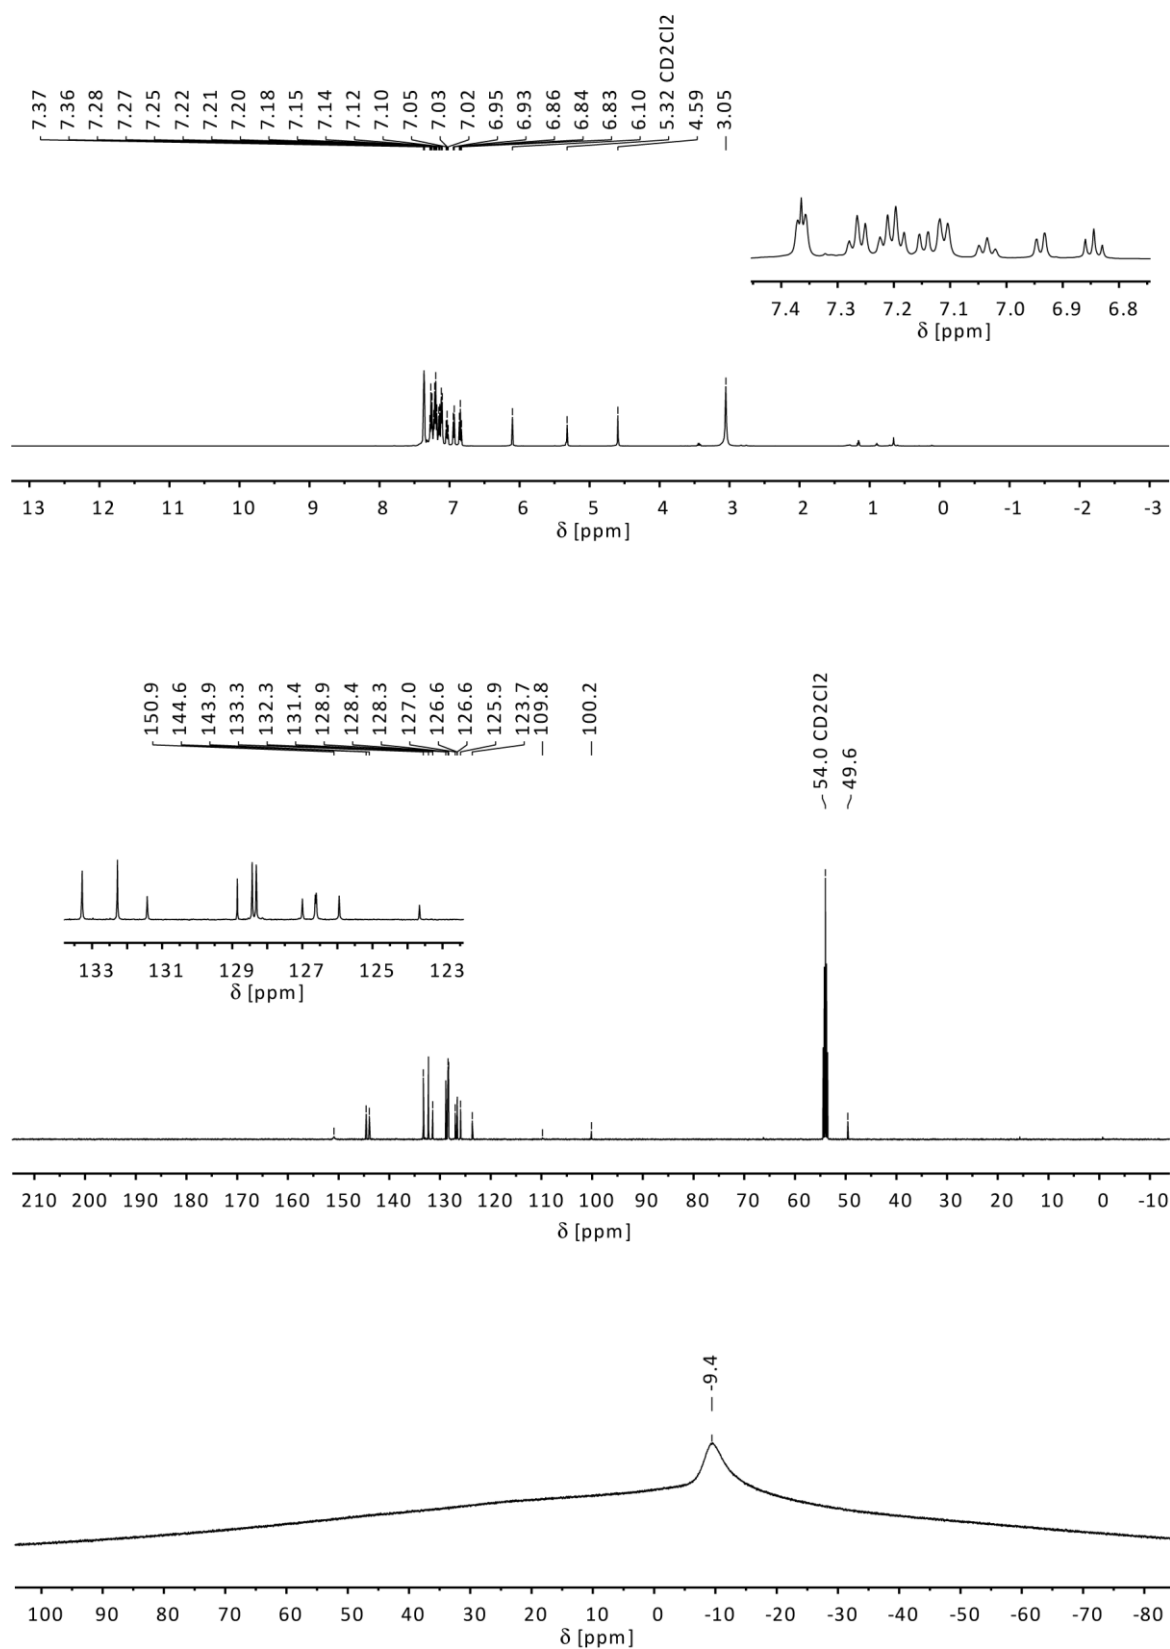

**Fig. S8** NMR spectra, <sup>1</sup>H NMR (above), <sup>13</sup>C{<sup>1</sup>H} NMR (centre), <sup>11</sup>B{<sup>1</sup>H} NMR (below), of compound **10**.

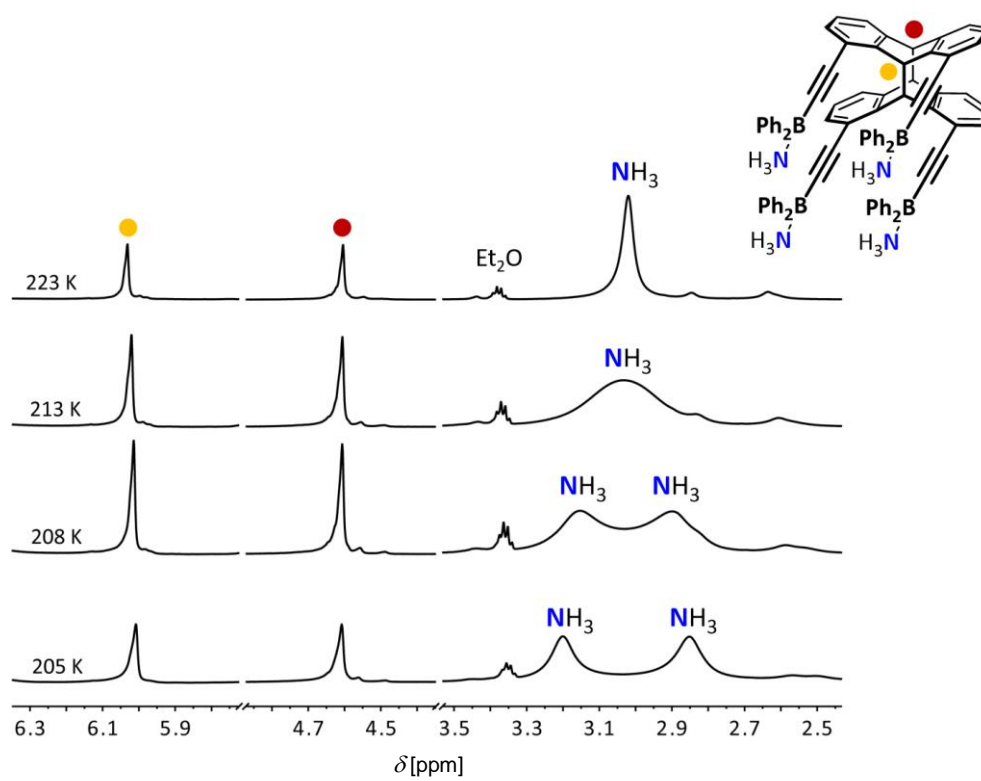

**Fig. S9** Excerpts of the  $^1\text{H}$  NMR spectra (600 MHz) of the ammonia adduct **10** at different temperatures in  $\text{CD}_2\text{Cl}_2$ .

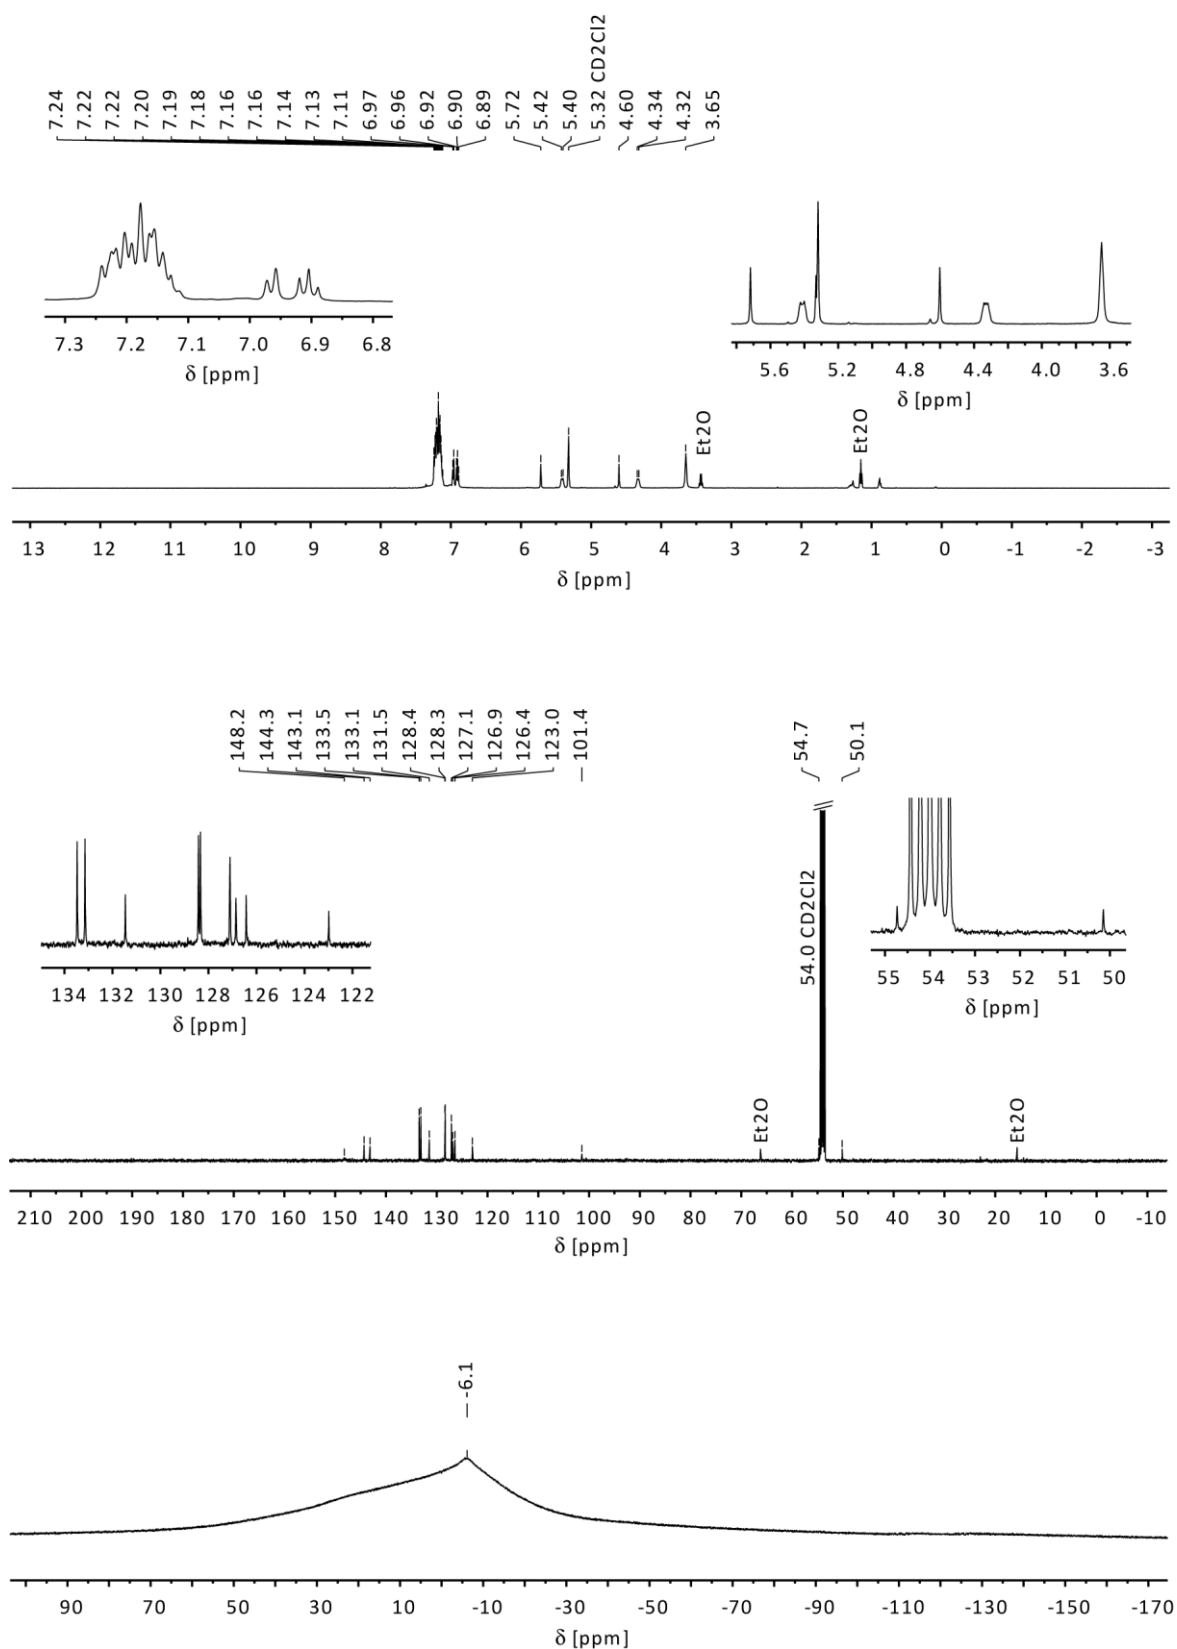

**Fig. S10** NMR spectra, <sup>1</sup>H NMR (above), <sup>13</sup>C{<sup>1</sup>H} NMR (centre), <sup>11</sup>B{<sup>1</sup>H} NMR (below), of compound **11**.

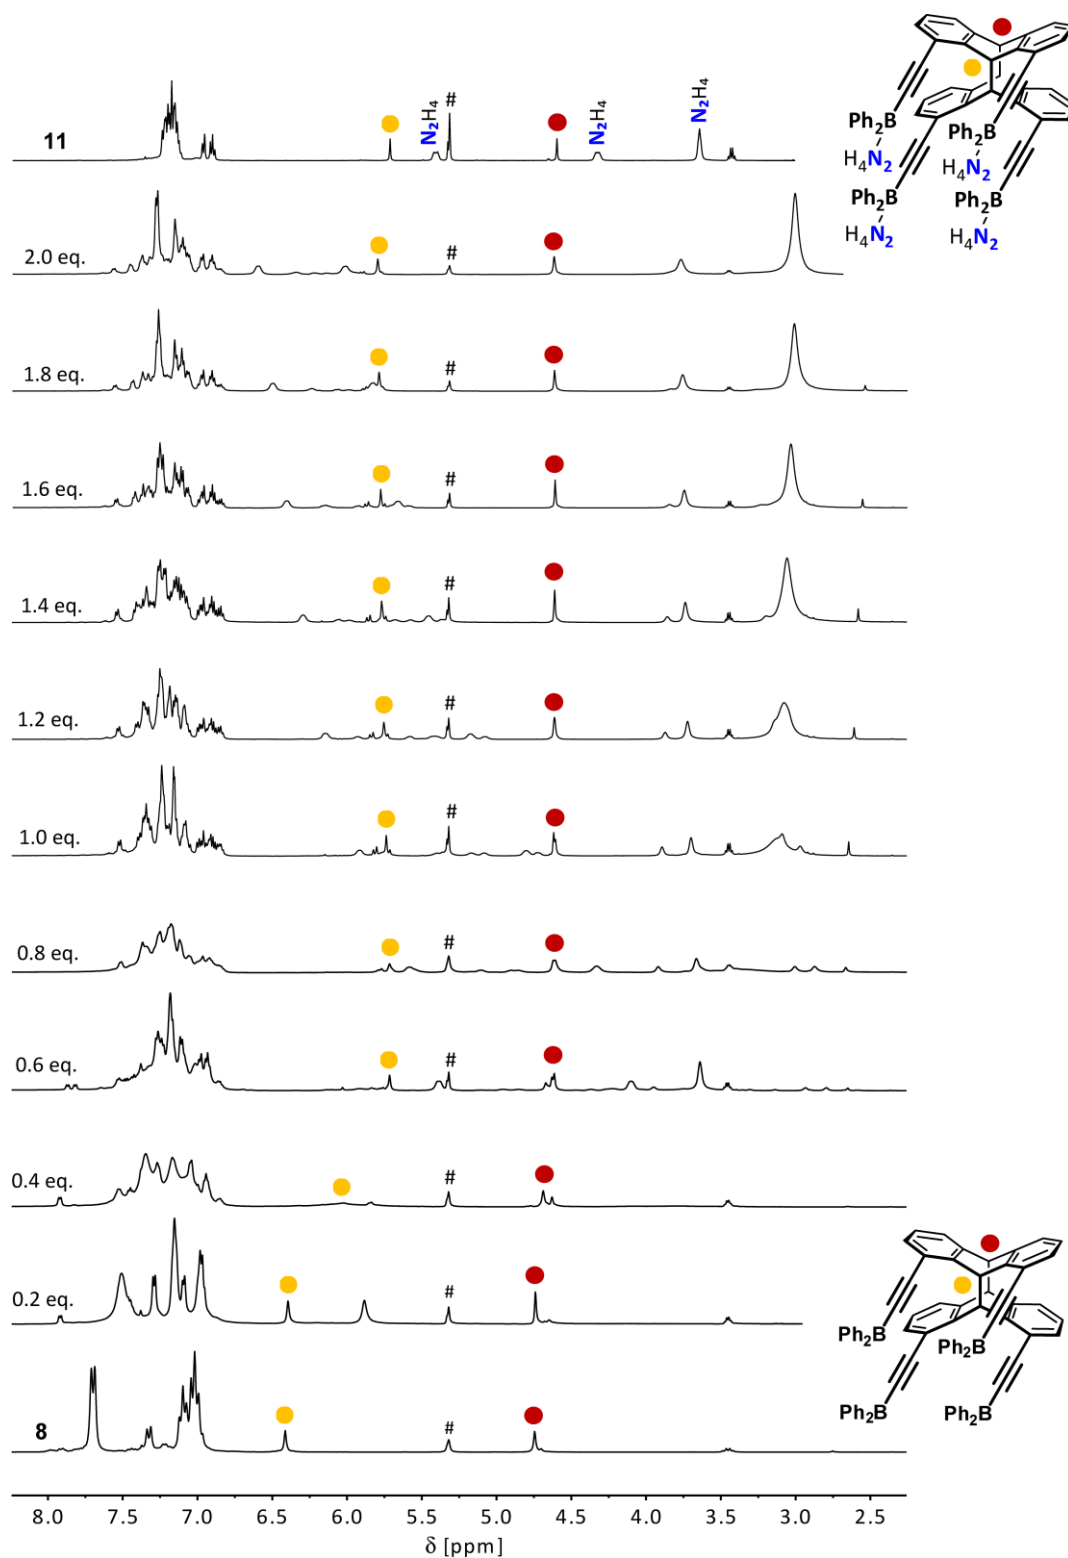

**Fig. S11**  $^1\text{H}$  NMR spectroscopy (500 MHz, 298 K) traces the adduct formation of tetraborane **8** by stepwise titration with hydrazine (0.2 eq. steps) in  $\text{CD}_2\text{Cl}_2$  (#). After a total amount of two equivalents hydrazine, the oligomeric complex **12** ( $[\mathbf{8}\cdot 5\text{N}_2\text{H}_4]_n$ ) was obtained as colourless crystals.  $^1\text{H}$  NMR spectra of free tetraborane **8** (below) and its tetrahydrazine adduct **11** ( $\mathbf{8}\cdot 4\text{N}_2\text{H}_4$ , above) are shown, comparatively.

As shown in Fig. S11, strong dynamics are observed during the titration of **8** with hydrazine. Especially  $\text{N}_2\text{H}_4$ -signals shift over a wide range of the NMR spectrum. The aromatic region indicates that a large number of different host/guest species are present at any time.

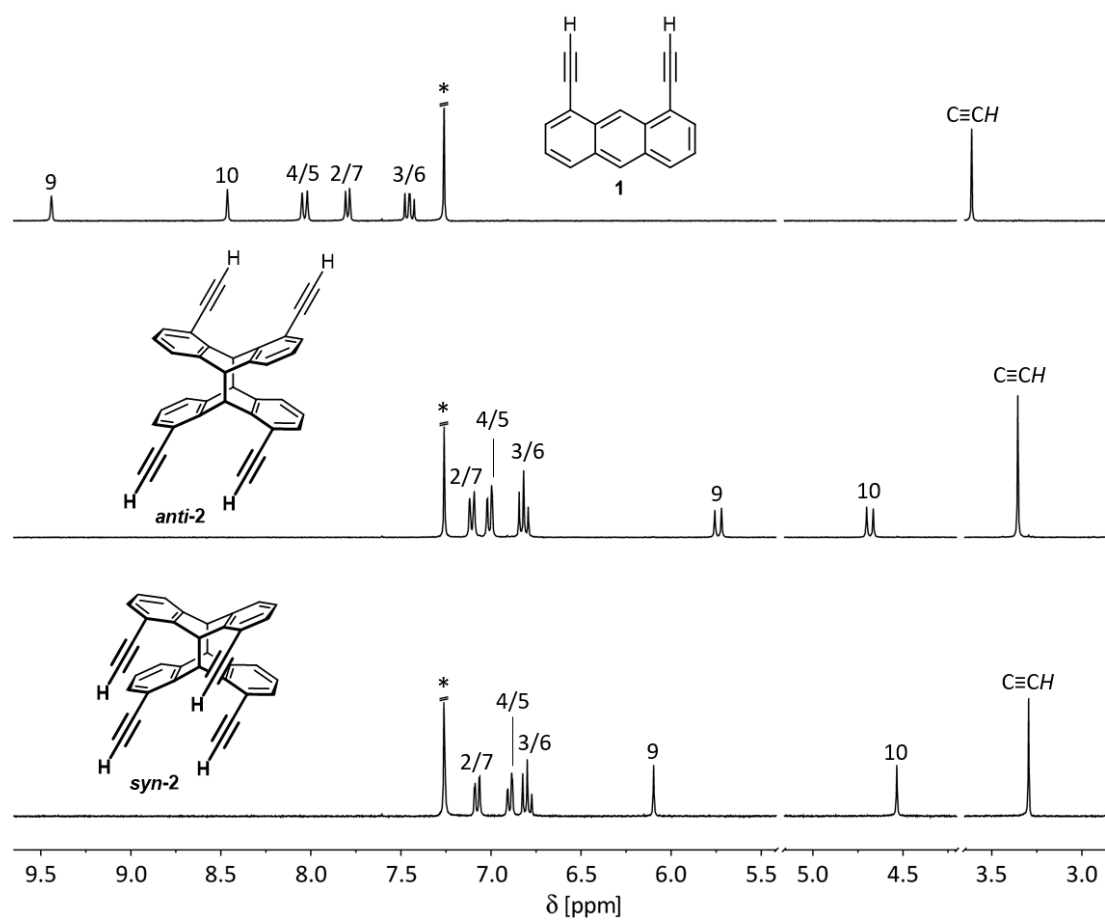

**Fig. S12** Excerpts of the  $^1\text{H}$  NMR spectra of anthracene monomer **1** (above) and its photo-isomers *anti*-**2** (centre) and *syn*-**2** (below).



## UV-VIS Absorption Spectra

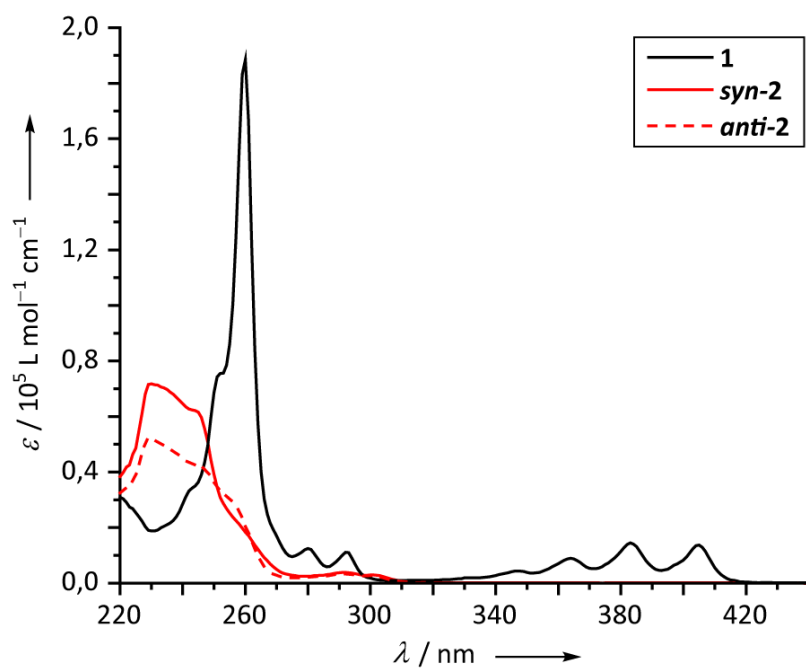

**Fig. S13** Absorption spectra of 1,8-diethynylantracene **1** (black line,  $8.0 \times 10^{-6} \text{ mol L}^{-1}$ ), as well as its photo-dimers **syn-2** (solid red line,  $1.5 \times 10^{-5} \text{ mol L}^{-1}$ ) and **anti-2** (dotted red line,  $1.4 \times 10^{-5} \text{ mol L}^{-1}$ ) in dichloromethane.

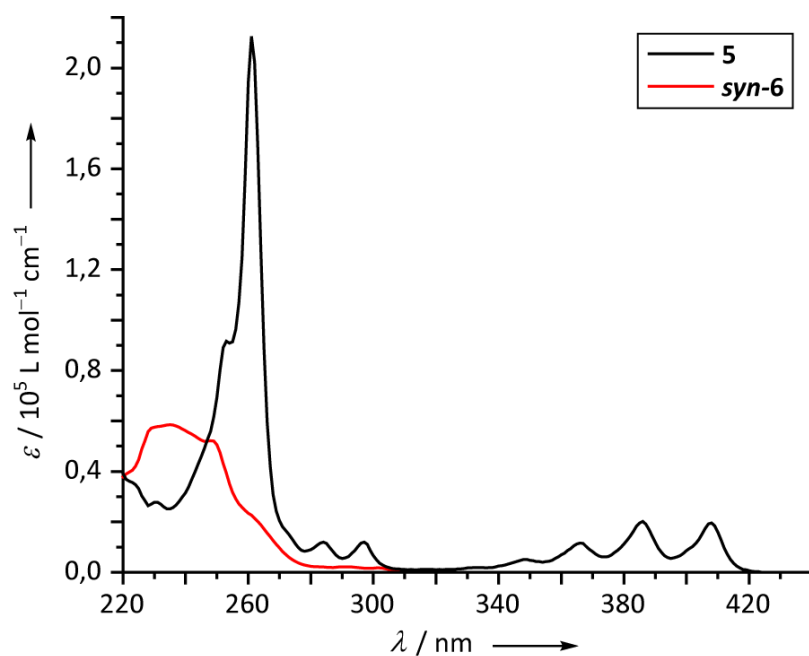

**Fig. S14** Absorption spectra of dialkynylantracene **5** (black line,  $5.3 \times 10^{-6} \text{ mol L}^{-1}$ ) and its photo-dimer **syn-6** (red line,  $1.5 \times 10^{-5} \text{ mol L}^{-1}$ ) in dichloromethane.

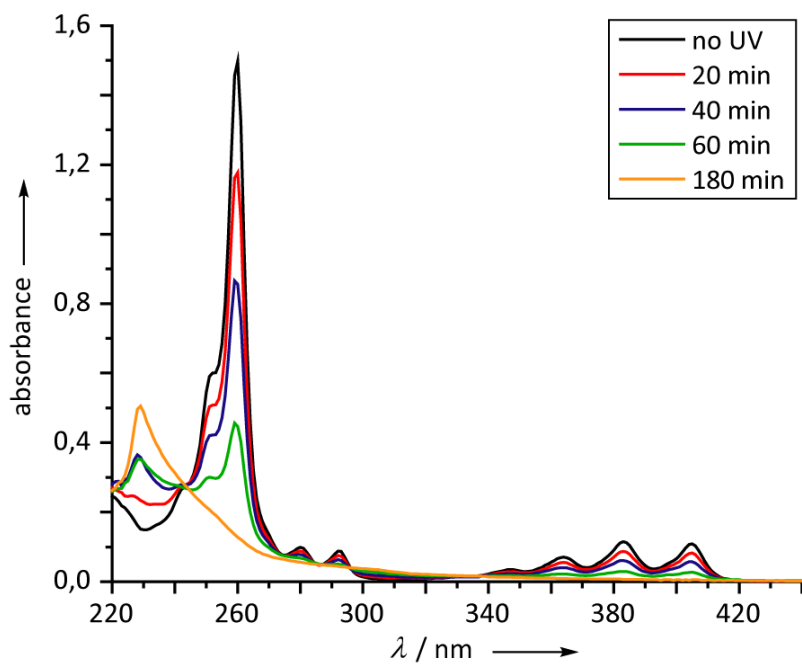

**Fig. S15** Absorption spectra of 1,8-diethynylanthracene **1** (black line,  $8.0 \times 10^{-6} \text{ mol L}^{-1}$ ) and the formed photo-isomers *syn-2* and *anti-2* in dichloromethane as a function of UV irradiation duration.

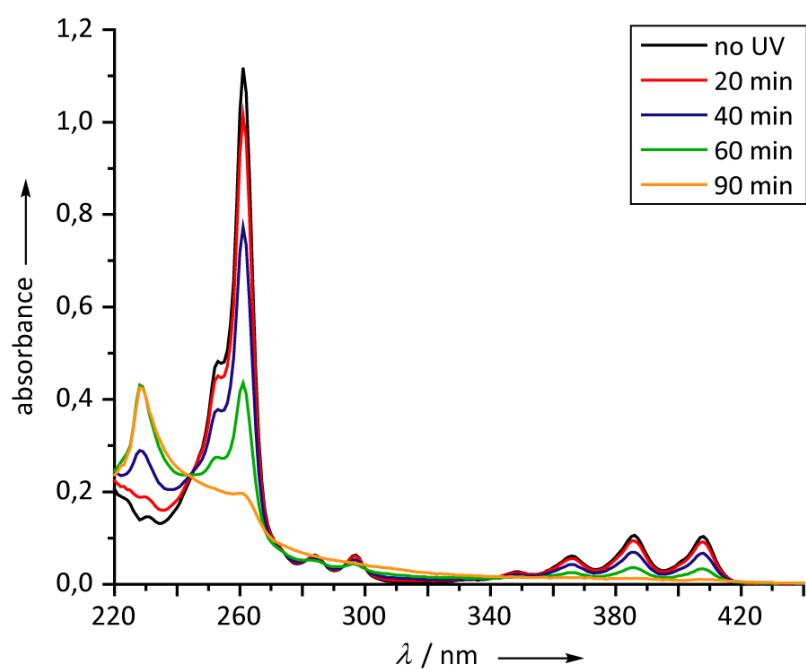

**Fig. S16** Absorption spectra of dialkynylanthracene **5** (black line,  $5.3 \times 10^{-6} \text{ mol L}^{-1}$ ) and the formed photo-isomers *syn-6* and *anti-6* in dichloromethane as a function of UV irradiation duration.

## Crystallographic Data

**General note:** Solid state structures of compounds **4**, **4a**, **anti-2** and **10b** were determined, but are not mentioned or depicted in the main text.

**Crystal structure determination:** Suitable crystals were obtained by slow evaporation of saturated solutions from benzene (**syn-2**, **5**, **syn-6** and **10**), toluene (**anti-2**), *n*-hexane (**4a**), dichloromethane/*n*-pentane 1:4 (**4**), THF/*n*-hexane 1:1 (**anti-6**) or slowly grown from benzene (**9**), acetonitrile (**10b**) or dichloromethane (**11** and **12**) after adding the corresponding base to solutions of tetraborane **8**, respectively. They were selected, coated with PARATONE-N oil, mounted on a glass fibre and transferred onto the goniometer of the diffractometer into a nitrogen gas cold stream solidifying the oil. Data collection was performed on a *Rigaku SuperNova* diffractometer, a *SuperNova, Dual, Cu at zero*, diffractometer, a *SuperNova, Single source at offset, Eos*, diffractometer and a *Nonius KappaCCD* diffractometer. Using Olex2,<sup>2</sup> the structures were solved with the SHELXT<sup>3</sup> structure solution program and refined with the SHELXL<sup>4</sup> refinement package. Crystal and refinement details, as well as CCDC numbers are provided in Tables S4 and S5. CCDC 1952344-1952355 contain the supplementary crystallographic data for this paper. These data can be obtained free of charge from The Cambridge Crystallographic Data Centre via <http://www.ccdc.cam.ac.uk/conts/retrieving.html>.

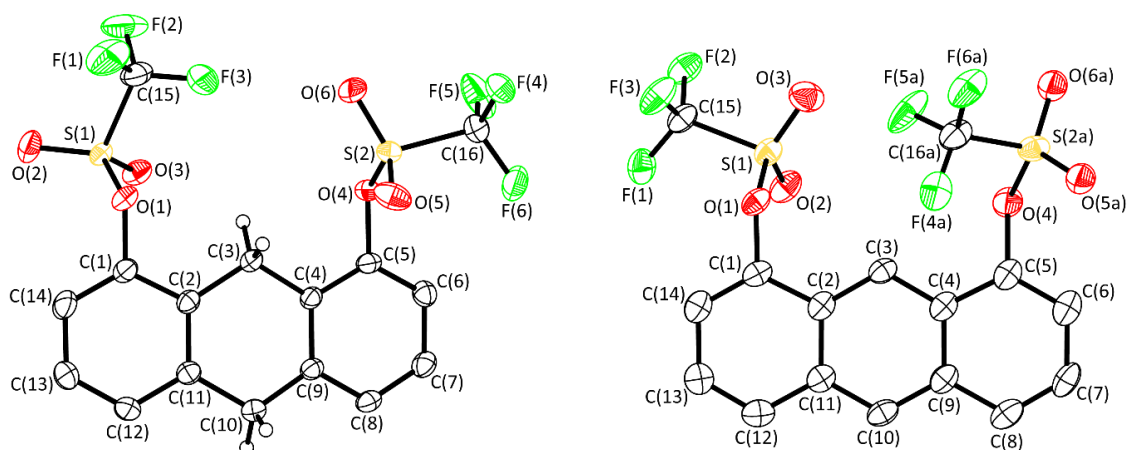

**Fig. S17** Molecular structures of anthracene-1,8-diyl bis(trifluoromethanesulfonate) (**4**, right) and its precursor 9,10-dihydroanthracene-1,8-diyl bis(trifluoromethanesulfonate) (**4a**, left) in the crystalline state. Displacement ellipsoids are drawn at 50% probability level, hydrogen atoms, except those of **4a** at C(3) and C(10), are omitted for clarity. Selected structural parameters are listed in Table S3.

**Table S4** Selected structural parameters of 9,10-dihydroanthracene-1,8-diyl bis(trifluoromethanesulfonate) (**4a**) and anthracene-1,8-diyl bis(trifluoromethanesulfonate) (**4**).

| Parameter                                    | <b>4a</b> | <b>4</b> |
|----------------------------------------------|-----------|----------|
| $d[\text{C}(1)\text{--C}(2)]/\text{\AA}$     | 1.394(2)  | 1.423(4) |
| $d[\text{C}(2)\text{--C}(3)]/\text{\AA}$     | 1.484(2)  | 1.403(5) |
| $d[\text{C}(1)\cdots\text{C}(5)]/\text{\AA}$ | 4.958(2)  | 4.978(5) |
| $d[\text{C}(2)\text{--C}(11)]/\text{\AA}$    | 1.403(2)  | 1.435(4) |
| $d[\text{C}(1)\text{--O}(1)]/\text{\AA}$     | 1.436(2)  | 1.436(4) |
| $d[\text{S}(1)\text{--O}(1)]/\text{\AA}$     | 1.574(1)  | 1.565(2) |

| Parameter                                               | <b>4a</b> | <b>4</b> |
|---------------------------------------------------------|-----------|----------|
| $d[\text{S}(1)\text{--O}(2)]/\text{\AA}$                | 1.415(1)  | 1.417(3) |
| $d[\text{S}(1)\text{--C}(15)]/\text{\AA}$               | 1.829(2)  | 1.839(3) |
| $\angle[\text{C}(14)\text{--C}(1)\text{--O}(1)]/^\circ$ | 118.5(1)  | 118.6(3) |
| $\angle[\text{C}(1)\text{--C}(2)\text{--C}(11)]/^\circ$ | 116.8(2)  | 116.0(3) |
| $\angle[\text{C}(2)\text{--C}(3)\text{--C}(4)]/^\circ$  | 114.7(1)  | 120.5(3) |
| $\tau[\text{Ar--Ar}]/^\circ$                            | 19.4(1)   | 0.8(1)   |

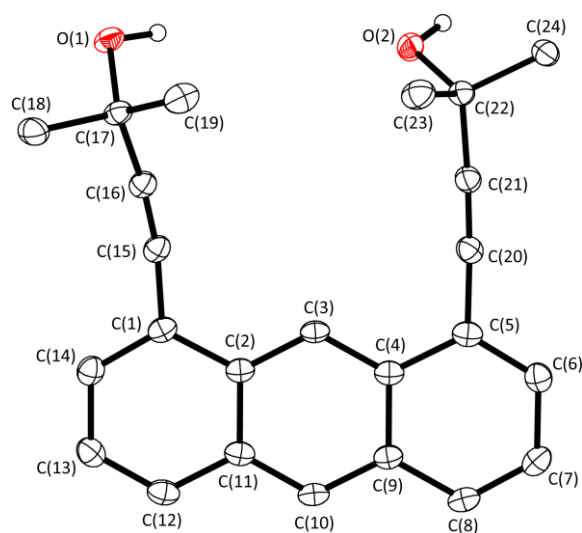

**Fig. S18** Molecular structure of **5** in the crystalline state. Displacement ellipsoids are drawn at 50% probability level, hydrogen atoms, except those of the hydroxyl-groups, are omitted for clarity. Selected bond lengths [Å] and angles [°]: C(1)–C(2) 1.445(2), C(1)–C(15) 1.439(2), C(2)–C(3) 1.397(2), C(2)–C(11) 1.438(2), C(15)–C(16) 1.199(2), C(16)–C(17) 1.488(2), C(17)–C(18) 1.522(2), C(17)–O(1) 1.435(2); C(1)–C(2)–C(3) 122.6(1), C(1)–C(2)–C(11) 118.2(1), C(1)–C(15)–C(16) 171.5(2), C(15)–C(16)–C(17) 170.5(2), C(16)–C(17)–C(18) 107.7(1), C(16)–C(17)–O(1) 111.3(1), C(18)–C(17)–O(1) 106.3(1).

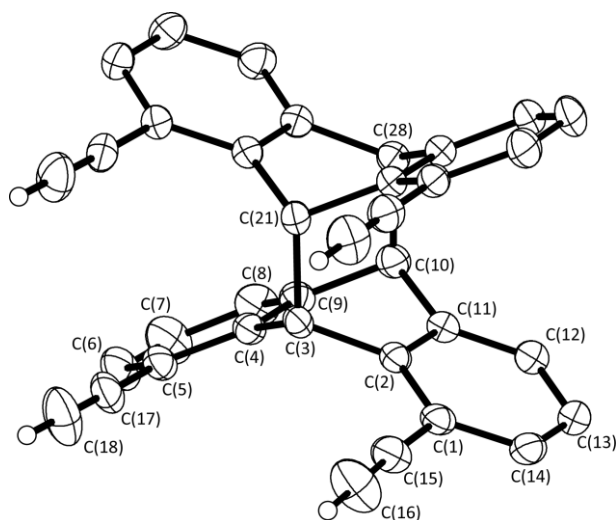

**Fig. S19** Molecular structure of *syn-2* in the crystalline state. Displacement ellipsoids are drawn at 50% probability level, hydrogen atoms, except those of the ethynyl groups, are omitted for clarity. Selected bond lengths [ $\text{\AA}$ ] and angles [ $^\circ$ ]: C(1)–C(2) 1.403(1), C(1)–C(15) 1.438(1), C(2)–C(3) 1.520(1), C(2)–C(11) 1.397(1), C(3)–C(21) 1.615(1), C(10)–C(28) 1.616(1), C(15)–C(16) 1.189(2); C(1)–C(2)–C(3) 123.3(1), C(1)–C(2)–C(11) 119.3(1), C(1)–C(15)–C(16) 177.4(1), C(2)–C(3)–C(4) 107.9(1), C(2)–C(3)–C(21) 112.6(1), C(9)–C(10)–C(28) 112.9(1).

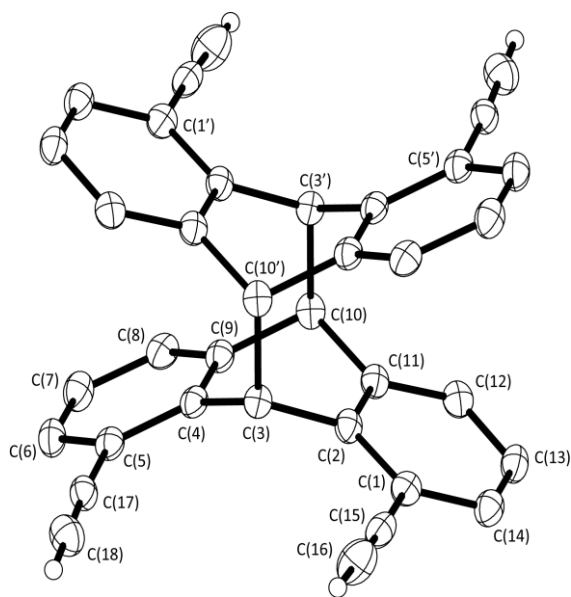

**Fig. S20** Molecular structure of *anti-2* in the crystalline state. Displacement ellipsoids are drawn at 50% probability level, hydrogen atoms, except those of the ethynyl groups, are omitted for clarity. Selected bond lengths [ $\text{\AA}$ ] and angles [ $^\circ$ ]: C(1)–C(2) 1.401(3), C(1)–C(15) 1.446(3), C(2)–C(3) 1.516(2), C(2)–C(11) 1.395(3), C(3)–C(10') 1.613(2), C(10)–C(11) 1.515(3), C(15)–C(16) 1.182(3); C(1)–C(2)–C(3) 122.5(2), C(1)–C(2)–C(11) 120.1(2), C(1)–C(15)–C(16) 177.3(2), C(2)–C(3)–C(4) 108.3(1), C(2)–C(3)–C(10') 111.6(1), C(9)–C(10)–C(3') 110.8(1).

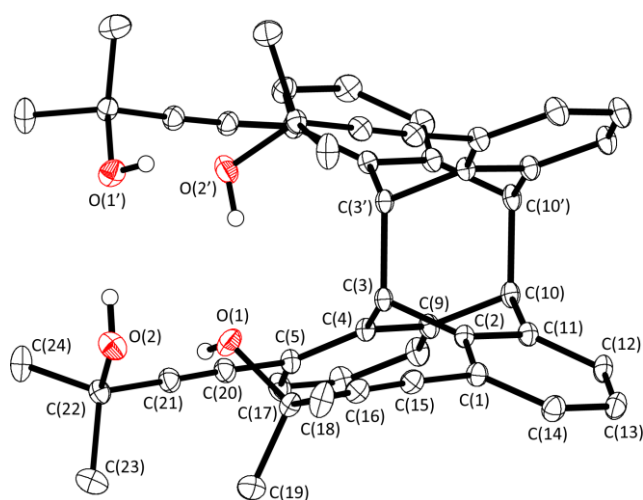

**Fig. S21** Molecular structure of *syn-6* in the crystalline state. Displacement ellipsoids are drawn at 50% probability level, hydrogen atoms, except those of the hydroxyl groups, are omitted for clarity. Selected bond lengths [Å] and angles [°]: C(1)–C(2) 1.405(1), C(1)–C(15) 1.437(2), C(2)–C(3) 1.517(1), C(2)–C(11) 1.402(1), C(3)–C(3′) 1.614(2), C(10)–C(10′) 1.600(2), C(10)–C(11) 1.512(1), C(15)–C(16) 1.202(2), C(16)–C(17) 1.479(2), C(17)–C(18) 1.529(2), C(17)–O(1) 1.441(1); C(1)–C(2)–C(3) 123.5(1), C(1)–C(2)–C(11) 119.2(1), C(1)–C(15)–C(16) 177.6(1), C(2)–C(3)–C(4) 107.1(1), C(2)–C(3)–C(3′) 112.2(1), C(9)–C(10)–C(10′) 112.0(1), C(15)–C(16)–C(17) 178.3(1), C(16)–C(17)–C(18) 109.9(1), C(16)–C(17)–O(1) 110.0(1), C(18)–C(17)–O(1) 107.8(1).

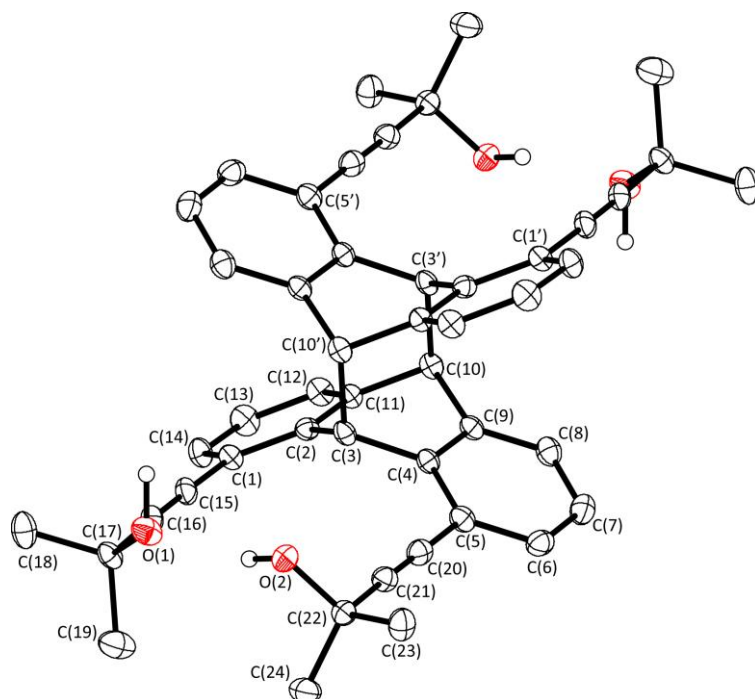

**Fig. S22** Molecular structure of *anti-6* in the crystalline state. Displacement ellipsoids are drawn at 50% probability level, hydrogen atoms, except those of the hydroxyl groups, are omitted for clarity. Selected bond lengths [Å] and angles [°]: C(1)–C(2) 1.403(2), C(1)–C(15) 1.429(2), C(2)–C(3) 1.513(2), C(2)–C(11) 1.386(2), C(3)–C(10′) 1.609(2), C(10)–C(11) 1.513(2), C(15)–C(16) 1.198(2), C(16)–C(17) 1.477(2), C(17)–C(18) 1.521(2), C(17)–O(1) 1.439(2); C(1)–C(2)–C(3) 122.5(2), C(1)–C(2)–C(11) 119.8(2), C(1)–C(15)–C(16) 176.5(2), C(2)–C(3)–C(4) 107.7(1), C(2)–C(3)–C(10′) 111.6(1), C(3′)–C(10)–C(9) 111.8(1), C(15)–C(16)–C(17) 178.5(2), C(16)–C(17)–C(18) 110.2(1), C(16)–C(17)–O(1) 109.2(1), C(18)–C(17)–O(1) 109.7(1).

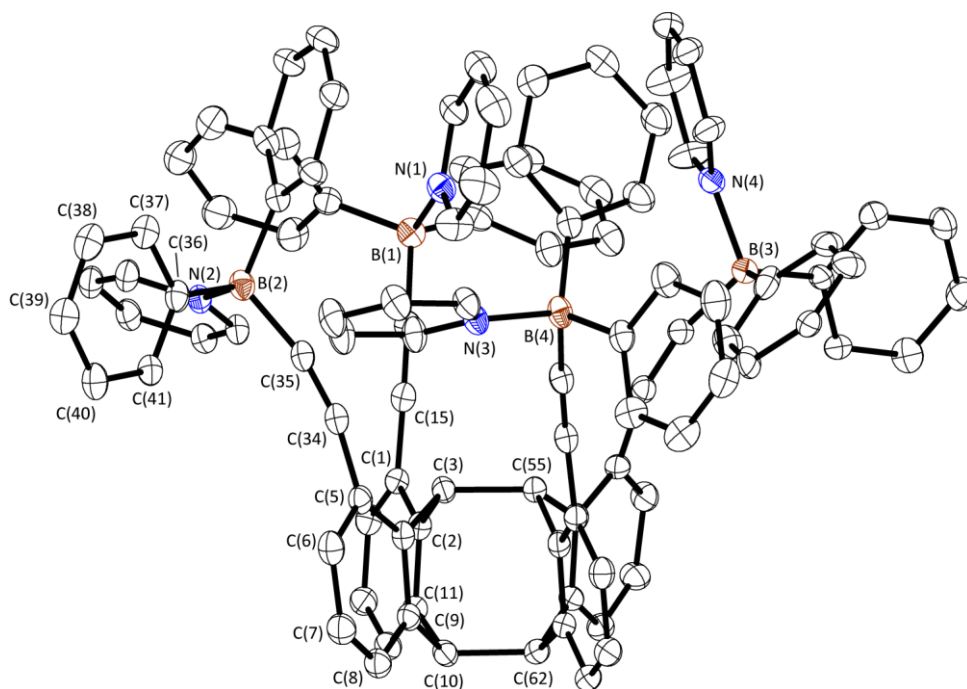

**Fig. S23** Molecular structure of **9** in the crystalline state. Displacement ellipsoids are drawn at only 15% probability level. Hydrogen atoms are omitted for clarity. Selected bond lengths [Å] and angles [°]: C(1)–C(2) 1.396(4), C(1)–C(15) 1.420(5), C(2)–C(3) 1.529(4), C(2)–C(11) 1.403(5), C(3)–C(55) 1.622(4), C(5)–C(34) 1.427(5), C(10)–C(62) 1.609(4), C(34)–C(35) 1.218(5), C(35)–B(2) 1.606(6), C(36)–B(2) 1.622(5), B(1)–N(1) 1.636(5), B(2)–N(2) 1.649(5), B(3)–N(3) 1.634(5), B(4)–N(4) 1.643(4); C(1)–C(2)–C(3) 123.6(3), C(1)–C(2)–C(11) 118.6(3), C(2)–C(3)–C(55) 114.7(3), C(5)–C(34)–C(35) 167.7(3), C(9)–C(10)–C(62) 114.1(3), C(34)–C(35)–B(2) 167.7(3), C(35)–B(2)–C(36) 109.4(3), C(35)–B(2)–N(2) 104.3(3), C(36)–C(37)–C(38) 121.8(4), C(36)–B(2)–N(2) 106.9(3), C(37)–C(36)–B(2) 122.4(4).



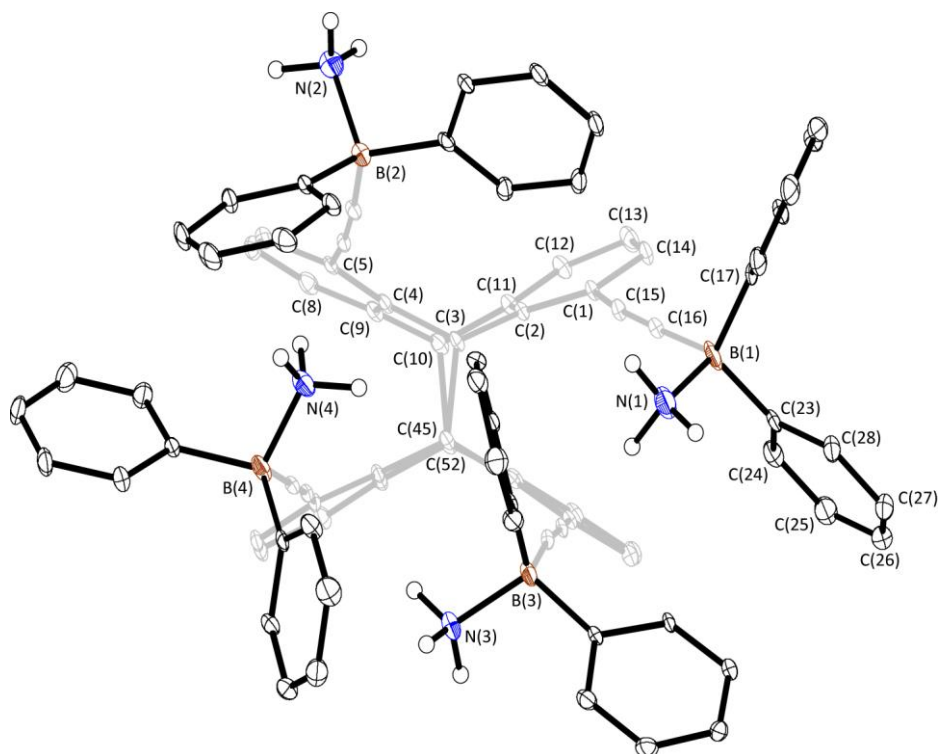

**Fig. S24** Molecular structure of **10** in the crystalline state. Displacement ellipsoids are drawn at 30% (for C) and 50% (for B and N) probability levels. Carbon-bound hydrogen atoms are omitted for clarity. Selected bond lengths [Å] and angles [°]: C(1)–C(2) 1.394(3), C(1)–C(15) 1.442(4), C(2)–C(3) 1.524(3), C(2)–C(11) 1.409(3), C(3)–C(45) 1.611(3), C(10)–C(52) 1.616(3), C(15)–C(16) 1.209(4), C(16)–B(1) 1.590(4), C(23)–B(1) 1.616(4), B(1)–N(1) 1.620(3), B(2)–N(2) 1.639(3), B(3)–N(3) 1.635(3), B(4)–N(4) 1.630(3); C(1)–C(2)–C(3) 124.8(2), C(1)–C(2)–C(11) 118.3(2), C(1)–C(15)–C(16) 165.1(3), C(2)–C(3)–C(45) 114.2(2), C(9)–C(10)–C(52) 114.5(2), C(15)–C(16)–B(1) 172.2(3), C(16)–B(1)–C(23) 111.5(2), C(16)–B(1)–N(1) 106.3(2), C(23)–C(24)–C(25) 122.7(3), C(23)–B(1)–N(1) 106.7(2), C(24)–C(23)–B(1) 124.2(2).

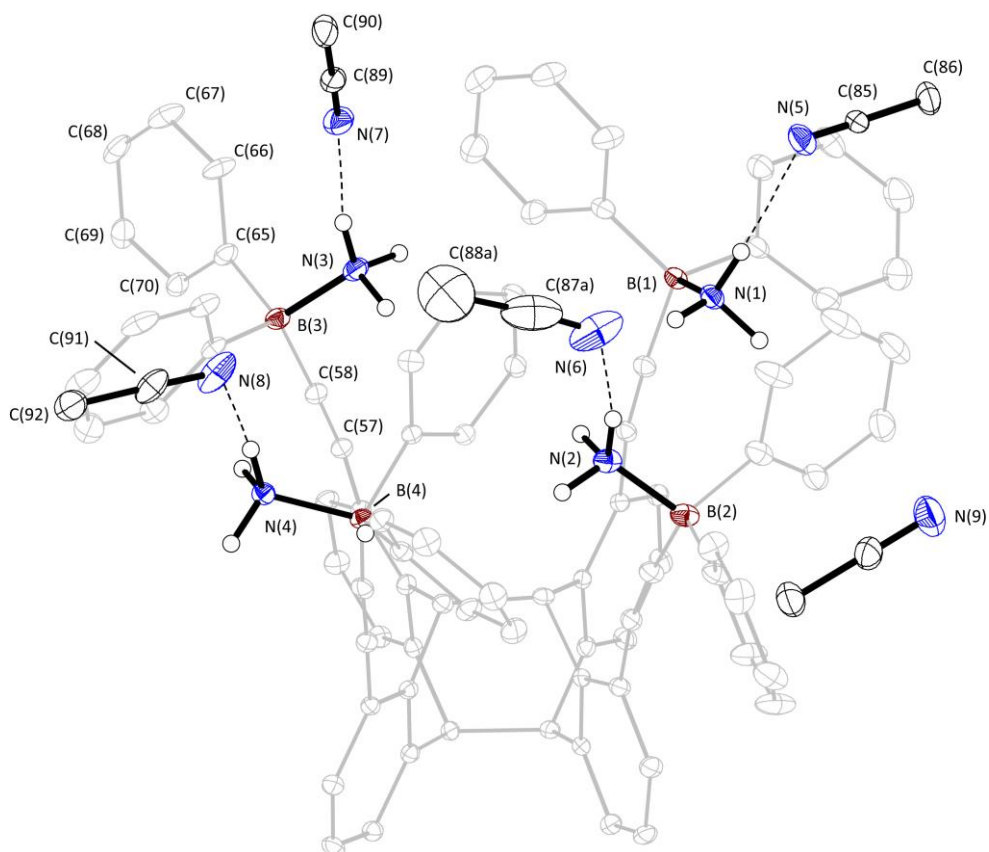

**Fig S25** Molecular structure of **10b** (**8**·4NH<sub>3</sub>·4MeCN) in the crystalline state. Single crystals were obtained, when a solution of **8** in acetonitrile was converted with an excess of gaseous ammonia. Displacement ellipsoids are drawn at 25% probability level. Carbon-bound hydrogen atoms are omitted for clarity. Selected bond lengths [Å] and angles [°]: C(57)–C(58) 1.224(5), C(58)–B(3) 1.585(5), C(65)–C(66) 1.400(5), C(65)–B(3) 1.625(5), C(66)–C(67) 1.393(6), C(67)–C(68) 1.381(7), C(85)–C(86) 1.448(6), C(85)–N(5) 1.145(5), C(87a)–C(88a) 1.505(11), C(87a)–N(6) 1.177(10), C(89)–C(90) 1.466(8), C(89)–N(7) 1.159(7), C(91)–C(92) 1.455(7), C(91)–N(8) 1.158(6), B(1)–N(1) 1.635(5), B(2)–N(2) 1.600(6), B(3)–N(3) 1.608(6), B(4)–N(4) 1.625(5); C(57)–C(58)–B(3) 173.9(4), C(58)–B(3)–C(65) 110.8(3), C(58)–B(3)–N(3) 106.6(3), C(66)–C(65)–B(3) 122.3(3), C(66)–C(65)–C(70) 116.5(3), C(86)–C(85)–N(5) 178.7(5), C(88a)–C(87a)–N(6) 176.3(9), C(90)–C(89)–N(7) 177.7(8), C(92)–C(91)–N(8) 178.7(5).

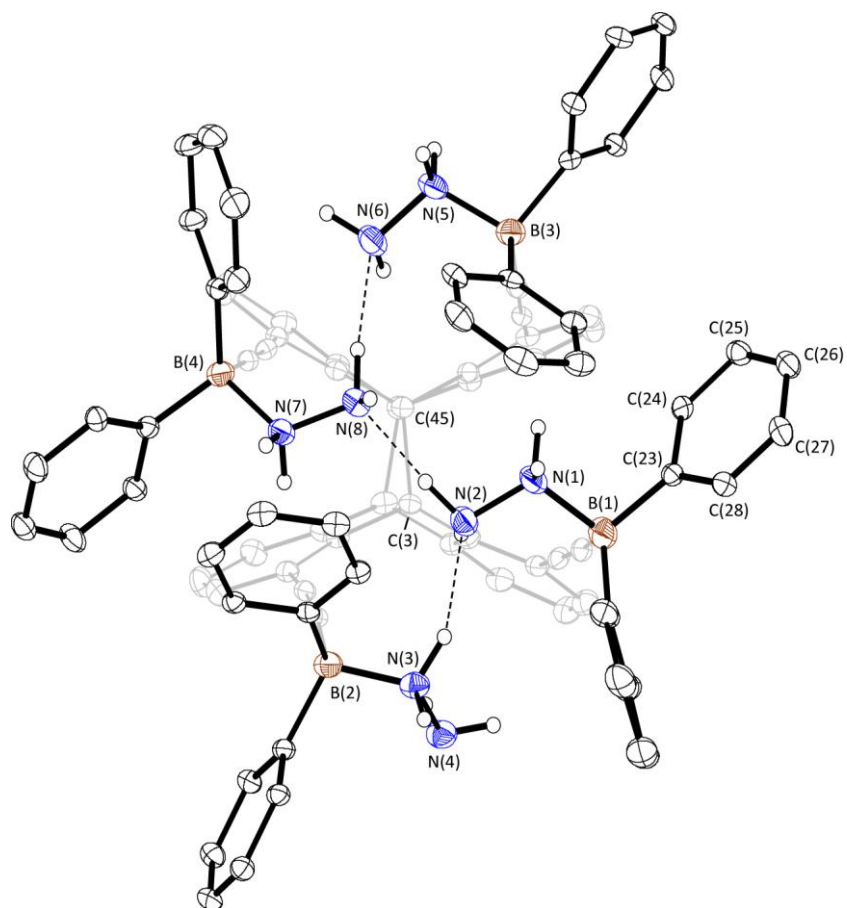

**Fig. S26** Molecular structure of **11** in the crystalline state. Displacement ellipsoids are drawn at 30% (for C) and 50% (for B and N) probability levels. Carbon-bound hydrogen atoms are omitted for clarity. Dotted lines indicate hydrogen bonds. Selected bond lengths [ $\text{\AA}$ ] and angles [ $^\circ$ ]: C(23)–C(24) 1.405(6), C(23)–B(1) 1.612(7), C(24)–C(25) 1.391(7), C(25)–C(26) 1.382(8), B(1)–N(1) 1.631(6), B(2)–N(3) 1.626(6), B(3)–N(5) 1.625(7), B(4)–N(7) 1.618(6), N(1)–N(2) 1.456(5), N(3)–N(4) 1.459(5), N(5)–N(6) 1.456(5), N(7)–N(8) 1.459(5); C(23)–C(24)–C(25) 122.5(5), C(23)–B(1)–N(1) 105.0(4), C(24)–C(23)–C(28) 115.9(4), C(24)–C(23)–B(1) 120.8(5), B(1)–N(1)–N(2) 112.3(3), B(2)–N(3)–N(4) 114.2(3), B(3)–N(5)–N(6) 113.6(3), B(4)–N(7)–N(8) 118.0(3).

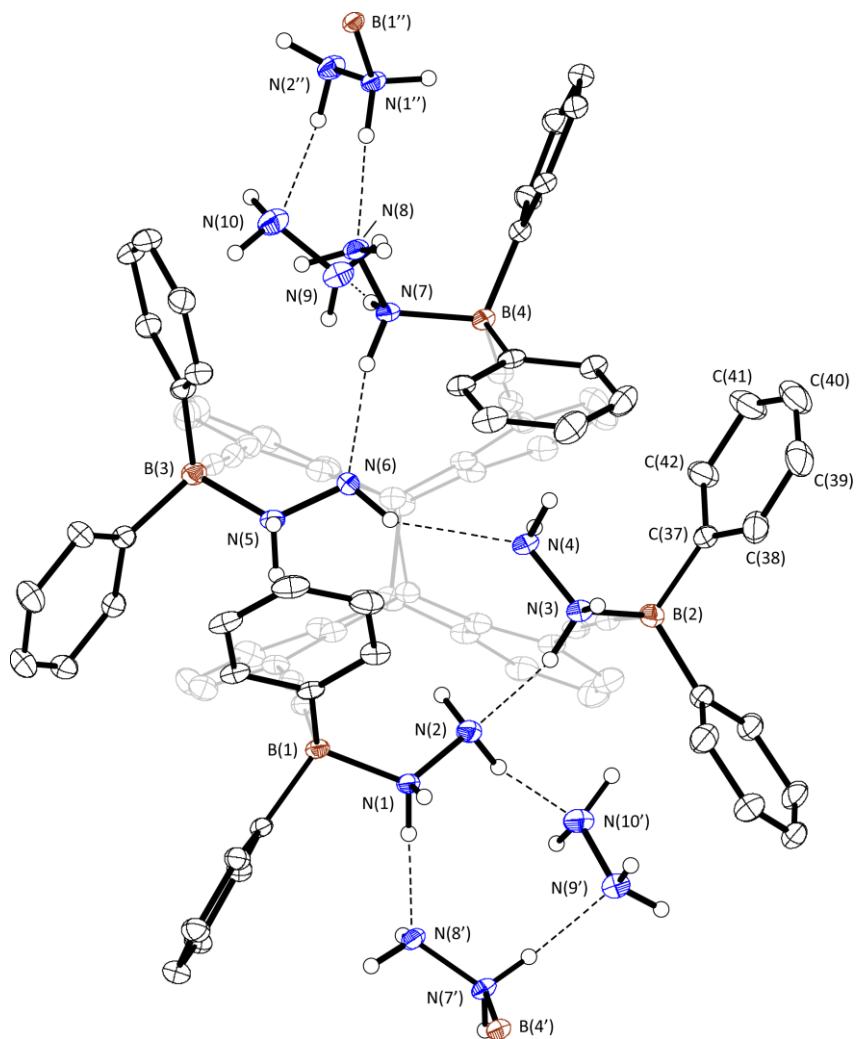

**Fig. S27** Molecular structure of **12** in the crystalline state. Displacement ellipsoids are drawn at 30% probability level. Carbon-bound hydrogen atoms are omitted for clarity. Symmetry code:  $-1/4 + y, 3/4 - x, -1/4 + z$  (for E') and  $3/4 - y, 1/4 + x, 1/4 + z$  (for E''). Dotted lines indicate hydrogen bonds. Selected bond lengths [Å] and angles [°]: C(37)–C(38) 1.397(6), C(37)–B(2) 1.618(5), C(38)–C(39) 1.390(6), C(39)–C(40) 1.383(8), B(1)–N(1) 1.639(4), B(2)–N(3) 1.622(5), B(3)–N(5) 1.630(5), B(4)–N(7) 1.621(4), N(1)–N(2) 1.465(4), N(3)–N(4) 1.459(4), N(5)–N(6) 1.456(4), N(7)–N(8) 1.460(4), N(9)–N(10) 1.427(5); C(37)–C(38)–C(39) 122.1(5), C(37)–B(2)–N(3) 108.0(3), C(38)–C(37)–C(42) 116.5(4), C(38)–C(37)–B(2) 120.9(4), B(1)–N(1)–N(2) 117.4(2), B(2)–N(3)–N(4) 114.9(3), B(3)–N(5)–N(6) 115.0(2), B(4)–N(7)–N(8) 115.2(2).

**Table S5** Crystallographic data for compounds **4a**, **4**, **5**, *syn-2*, *anti-2*, *syn-6* and *anti-6*.

|                                                         | <b>4a</b>                                                                    | <b>4</b>                                                                    | <b>5</b>                                       | <i>syn-2</i>                       | <i>anti-2</i>                                                      | <i>syn-6</i>                                   | <i>anti-6</i> <sup>[a]</sup>                                                    |
|---------------------------------------------------------|------------------------------------------------------------------------------|-----------------------------------------------------------------------------|------------------------------------------------|------------------------------------|--------------------------------------------------------------------|------------------------------------------------|---------------------------------------------------------------------------------|
| Empirical formula                                       | C <sub>16</sub> H <sub>10</sub> F <sub>6</sub> O <sub>2</sub> S <sub>2</sub> | C <sub>16</sub> H <sub>8</sub> F <sub>6</sub> O <sub>2</sub> S <sub>2</sub> | C <sub>24</sub> H <sub>22</sub> O <sub>2</sub> | C <sub>36</sub> H <sub>20</sub>    | C <sub>36</sub> H <sub>20</sub> ·0.5 C <sub>7</sub> H <sub>8</sub> | C <sub>54</sub> H <sub>50</sub> O <sub>4</sub> | C <sub>48</sub> H <sub>44</sub> O <sub>4</sub> ·C <sub>4</sub> H <sub>8</sub> O |
| <i>M<sub>r</sub></i>                                    | 476.36                                                                       | 474.34                                                                      | 342.41                                         | 452.52                             | 498.59                                                             | 762.94                                         | 756.93                                                                          |
| λ [Å]                                                   | 1.54184                                                                      | 1.54184                                                                     | 1.54184                                        | 1.54184                            | 0.71073                                                            | 0.71073                                        | 0.71073                                                                         |
| <i>T</i> [K]                                            | 100.0(1)                                                                     | 100.0(1)                                                                    | 100.0(1)                                       | 100.0(1)                           | 100.0(1)                                                           | 100.0(1)                                       | 100.0(1)                                                                        |
| <i>F</i> (000)                                          | 480                                                                          | 476                                                                         | 1456                                           | 944                                | 522                                                                | 812                                            | 404                                                                             |
| Crystal system                                          | triclinic                                                                    | triclinic                                                                   | orthorhombic                                   | monoclinic                         | triclinic                                                          | monoclinic                                     | triclinic                                                                       |
| Space group                                             | <i>P</i> $\bar{1}$                                                           | <i>P</i> $\bar{1}$                                                          | <i>Pna</i> 2 <sub>1</sub>                      | <i>P</i> 2 <sub>1</sub> / <i>n</i> | <i>P</i> $\bar{1}$                                                 | <i>P</i> 2/ <i>n</i>                           | <i>P</i> $\bar{1}$                                                              |
| <i>a</i> [Å]                                            | 9.5762(4)                                                                    | 5.4457(5)                                                                   | 11.74087(5)                                    | 10.03642(5)                        | 10.1399(8)                                                         | 11.1578(3)                                     | 9.8376(5)                                                                       |
| <i>b</i> [Å]                                            | 10.0978(5)                                                                   | 9.7022(10)                                                                  | 32.16370(14)                                   | 20.42255(9)                        | 11.8036(11)                                                        | 11.0555(3)                                     | 11.0362(7)                                                                      |
| <i>c</i> [Å]                                            | 10.1439(3)                                                                   | 17.3622(8)                                                                  | 9.77293(5)                                     | 12.53918(8)                        | 12.2024(11)                                                        | 17.2821                                        | 11.1225(6)                                                                      |
| α [°]                                                   | 87.983(3)                                                                    | 84.758(6)                                                                   | 90                                             | 90                                 | 104.246(4)                                                         | 90                                             | 89.252(5)                                                                       |
| β [°]                                                   | 78.962(3)                                                                    | 87.356(7)                                                                   | 90                                             | 111.7520(4)                        | 90.620(5)                                                          | 98.594(2)                                      | 66.881(5)                                                                       |
| γ [°]                                                   | 69.485(4)                                                                    | 74.878(9)                                                                   | 90                                             | 90                                 | 111.016(5)                                                         | 90                                             | 74.852(5)                                                                       |
| <i>V</i> [Å <sup>3</sup> ]                              | 901.16(7)                                                                    | 881.63(14)                                                                  | 3690.55(3)                                     | 2387.14(2)                         | 1313.5(2)                                                          | 2107.9(1)                                      | 1066.53(11)                                                                     |
| <i>Z</i>                                                | 2                                                                            | 2                                                                           | 8                                              | 4                                  | 2                                                                  | 2                                              | 1                                                                               |
| ρ <sub>calcd.</sub> [g cm <sup>-3</sup> ]               | 1.756                                                                        | 1.787                                                                       | 1.233                                          | 1.259                              | 1.261                                                              | 1.202                                          | 1.179                                                                           |
| μ [mm <sup>-1</sup> ]                                   | 3.595                                                                        | 3.674                                                                       | 0.603                                          | 0.545                              | 0.071                                                              | 0.074                                          | 0.074                                                                           |
| θ <sub>max</sub> [°]                                    | 72.35                                                                        | 72.33                                                                       | 72.32                                          | 72.32                              | 30.00                                                              | 30.03                                          | 26.021                                                                          |
| Index ranges <i>h</i>                                   | -11 ≤ <i>h</i> ≤ 11                                                          | -6 ≤ <i>h</i> ≤ 6                                                           | -14 ≤ <i>h</i> ≤ 14                            | -12 ≤ <i>h</i> ≤ 12                | -14 ≤ <i>h</i> ≤ 14                                                | -15 ≤ <i>h</i> ≤ 15                            | -11 ≤ <i>h</i> ≤ 12                                                             |
| Index ranges <i>k</i>                                   | -12 ≤ <i>k</i> ≤ 11                                                          | -11 ≤ <i>k</i> ≤ 11                                                         | -39 ≤ <i>k</i> ≤ 39                            | -25 ≤ <i>k</i> ≤ 25                | -16 ≤ <i>k</i> ≤ 15                                                | -15 ≤ <i>k</i> ≤ 15                            | -12 ≤ <i>k</i> ≤ 13                                                             |
| Index ranges <i>l</i>                                   | -12 ≤ <i>l</i> ≤ 12                                                          | -21 ≤ <i>l</i> ≤ 19                                                         | -11 ≤ <i>l</i> ≤ 12                            | -15 ≤ <i>l</i> ≤ 15                | -17 ≤ <i>l</i> ≤ 17                                                | -24 ≤ <i>l</i> ≤ 24                            | -13 ≤ <i>l</i> ≤ 13                                                             |
| Reflexes collected                                      | 13616                                                                        | 11552                                                                       | 63776                                          | 81574                              | 18989                                                              | 47712                                          | 9733                                                                            |
| Independent reflexes                                    | 3536                                                                         | 3434                                                                        | 6940                                           | 4718                               | 7266                                                               | 6166                                           | 4209                                                                            |
| <i>R</i> <sub>int</sub>                                 | 0.0191                                                                       | 0.0650                                                                      | 0.0249                                         | 0.0237                             | 0.061                                                              | 0.0338                                         | 0.0325                                                                          |
| Observed reflexes, <i>I</i> > 2σ( <i>I</i> )            | 3333                                                                         | 2672                                                                        | 6850                                           | 4582                               | 4680                                                               | 5319                                           | 3268                                                                            |
| Parameters                                              | 271                                                                          | 311                                                                         | 493                                            | 325                                | 389                                                                | 275                                            | 247                                                                             |
| <i>R</i> <sub>1</sub> , <i>I</i> > 2σ( <i>I</i> )       | 0.0312                                                                       | 0.0614                                                                      | 0.0256                                         | 0.0370                             | 0.0624                                                             | 0.0477                                         | 0.0509                                                                          |
| <i>wR</i> <sub>2</sub> , <i>I</i> > 2σ( <i>I</i> )      | 0.0842                                                                       | 0.1619                                                                      | 0.0675                                         | 0.0988                             | 0.1315                                                             | 0.1392                                         | 0.1234                                                                          |
| <i>R</i> <sub>1</sub> (all data)                        | 0.0330                                                                       | 0.0769                                                                      | 0.0260                                         | 0.0377                             | 0.1116                                                             | 0.0548                                         | 0.0659                                                                          |
| <i>wR</i> <sub>2</sub> (all data)                       | 0.0860                                                                       | 0.1782                                                                      | 0.0681                                         | 0.0994                             | 0.1564                                                             | 0.1452                                         | 0.1321                                                                          |
| <i>GoF</i>                                              | 1.053                                                                        | 1.016                                                                       | 1.032                                          | 1.043                              | 1.022                                                              | 1.073                                          | 1.043                                                                           |
| ρ <sub>max</sub> /ρ <sub>min</sub> [e Å <sup>-3</sup> ] | 0.38/-0.37                                                                   | 0.48/-0.73                                                                  | 0.14/-0.17                                     | 0.25/-0.22                         | 0.33/-0.25                                                         | 0.47/-0.36                                     | 0.27/-0.21                                                                      |
| Flack parameter                                         | –                                                                            | –                                                                           | 0.02(4)                                        | –                                  | –                                                                  | –                                              | –                                                                               |
| CCDC number                                             | 1952344                                                                      | 1952345                                                                     | 1952346                                        | 1952347                            | 1952348                                                            | 1952349                                        | 1952350                                                                         |

[a] The unit cell contains one highly disordered thf solvent molecule, which was “squeezed” using the Olex2 routine, but included into the sum formula and dependent values.

**Table S6** Crystallographic data for compounds **9**, **10**, **10b**, **11** and **12**.

|                                                         | <b>9</b> <sup>[a]</sup>                                        | <b>10</b> <sup>[b]</sup>                                       | <b>10b</b> <sup>[c]</sup>                                              | <b>11</b> <sup>[d]</sup>                                                               | <b>12</b> <sup>[e]</sup>                                       |
|---------------------------------------------------------|----------------------------------------------------------------|----------------------------------------------------------------|------------------------------------------------------------------------|----------------------------------------------------------------------------------------|----------------------------------------------------------------|
| Empirical formula                                       | C <sub>104</sub> H <sub>76</sub> B <sub>4</sub> N <sub>4</sub> | C <sub>105</sub> H <sub>89</sub> B <sub>4</sub> N <sub>4</sub> | C <sub>95.25</sub> H <sub>84.87</sub> B <sub>4</sub> N <sub>9.62</sub> | C <sub>87.33</sub> H <sub>78.66</sub> B <sub>4</sub> Cl <sub>6.66</sub> N <sub>8</sub> | C <sub>84</sub> H <sub>76</sub> B <sub>4</sub> N <sub>10</sub> |
| <i>M<sub>r</sub></i>                                    | 1424.92                                                        | 1450.04                                                        | 1407.49                                                                | 1519.63                                                                                | 1268.78                                                        |
| λ [Å]                                                   | 1.54184                                                        | 1.54184                                                        | 1.54184                                                                | 1.54184                                                                                | 1.54184                                                        |
| <i>T</i> [K]                                            | 100.0(1)                                                       | 100.0(1)                                                       | 100.0(1)                                                               | 100.0(1)                                                                               | 100.0(1)                                                       |
| <i>F</i> (000)                                          | 2992                                                           | 1534                                                           | 5950                                                                   | 3168                                                                                   | 10720                                                          |
| Crystal system                                          | monoclinic                                                     | triclinic                                                      | orthorhombic                                                           | orthorhombic                                                                           | tetragonal                                                     |
| Space group                                             | <i>P</i> 2 <sub>1</sub> / <i>c</i>                             | <i>P</i> $\bar{1}$                                             | <i>Pbca</i>                                                            | <i>Pna</i> 2 <sub>1</sub>                                                              | <i>I</i> <sub>4</sub> / <i>a</i>                               |
| <i>a</i> [Å]                                            | 14.0002(4)                                                     | 14.4537(8)                                                     | 19.2454(7)                                                             | 23.0669(4)                                                                             | 26.4901(4)                                                     |
| <i>b</i> [Å]                                            | 40.8950(12)                                                    | 14.7536(6)                                                     | 28.1544(12)                                                            | 22.8536(4)                                                                             | 26.4901(4)                                                     |
| <i>c</i> [Å]                                            | 17.3331(6)                                                     | 20.5177(7)                                                     | 29.7705(10)                                                            | 15.3750(4)                                                                             | 44.9400(11)                                                    |
| α [°]                                                   | 90                                                             | 100.327(3)                                                     | 90                                                                     | 90                                                                                     | 90                                                             |
| β [°]                                                   | 91.677(3)                                                      | 98.165(4)                                                      | 90                                                                     | 90                                                                                     | 90                                                             |
| γ [°]                                                   | 90                                                             | 99.886(4)                                                      | 90                                                                     | 90                                                                                     | 90                                                             |
| <i>V</i> [Å <sup>3</sup> ]                              | 9919.6(5)                                                      | 4172.5(3)                                                      | 16130.9(11)                                                            | 8105.2(3)                                                                              | 31535.6(12)                                                    |
| <i>Z</i>                                                | 4                                                              | 2                                                              | 8                                                                      | 4                                                                                      | 16                                                             |
| ρ <sub>calcd.</sub> [g cm <sup>-3</sup> ]               | 0.954                                                          | 1.154                                                          | 1.159                                                                  | 1.245                                                                                  | 1.069                                                          |
| μ [mm <sup>-1</sup> ]                                   | 0.414                                                          | 0.496                                                          | 0.518                                                                  | 2.518                                                                                  | 0.482                                                          |
| θ <sub>max</sub> [°]                                    | 66.75                                                          | 67.08                                                          | 67.08                                                                  | 78.553                                                                                 | 66.594                                                         |
| Index ranges <i>h</i>                                   | -16 ≤ <i>h</i> ≤ 16                                            | -15 ≤ <i>h</i> ≤ 17                                            | -20 ≤ <i>h</i> ≤ 22                                                    | -29 ≤ <i>h</i> ≤ 29                                                                    | -31 ≤ <i>h</i> ≤ 31                                            |
| Index ranges <i>k</i>                                   | -48 ≤ <i>k</i> ≤ 34                                            | -17 ≤ <i>k</i> ≤ 17                                            | -33 ≤ <i>k</i> ≤ 22                                                    | -28 ≤ <i>k</i> ≤ 29                                                                    | -26 ≤ <i>k</i> ≤ 31                                            |
| Index ranges <i>l</i>                                   | -18 ≤ <i>l</i> ≤ 20                                            | -21 ≤ <i>l</i> ≤ 24                                            | -34 ≤ <i>l</i> ≤ 35                                                    | -19 ≤ <i>l</i> ≤ 19                                                                    | -53 ≤ <i>l</i> ≤ 53                                            |
| Reflexes collected                                      | 66655                                                          | 28058                                                          | 54697                                                                  | 91890                                                                                  | 114503                                                         |
| Independent reflexes                                    | 17595                                                          | 14901                                                          | 14388                                                                  | 16668                                                                                  | 13948                                                          |
| <i>R</i> <sub>int</sub>                                 | 0.0692                                                         | 0.0986                                                         | 0.1485                                                                 | 0.0592                                                                                 | 0.1541                                                         |
| Observed reflexes, <i>I</i> > 2σ( <i>I</i> )            | 10611                                                          | 9295                                                           | 8076                                                                   | 14362                                                                                  | 9399                                                           |
| Parameters                                              | 1113                                                           | 1097                                                           | 1081                                                                   | 1126                                                                                   | 963                                                            |
| <i>R</i> <sub>1</sub> , <i>I</i> > 2σ( <i>I</i> )       | 0.0871                                                         | 0.0598                                                         | 0.0687                                                                 | 0.0605                                                                                 | 0.0750                                                         |
| <i>wR</i> <sub>2</sub> , <i>I</i> > 2σ( <i>I</i> )      | 0.2509                                                         | 0.1279                                                         | 0.1662                                                                 | 0.1554                                                                                 | 0.1677                                                         |
| <i>R</i> <sub>1</sub> (all data)                        | 0.1196                                                         | 0.1035                                                         | 0.1349                                                                 | 0.0724                                                                                 | 0.1095                                                         |
| <i>wR</i> <sub>2</sub> (all data)                       | 0.2793                                                         | 0.1475                                                         | 0.2177                                                                 | 0.1723                                                                                 | 0.1949                                                         |
| <i>GoF</i>                                              | 1.051                                                          | 0.931                                                          | 1.011                                                                  | 1.063                                                                                  | 1.023                                                          |
| ρ <sub>max</sub> /ρ <sub>min</sub> [e Å <sup>-3</sup> ] | 0.50/-0.26                                                     | 0.32/-0.27                                                     | 0.28/-0.31                                                             | 0.83/-0.44                                                                             | 0.28/-0.27                                                     |
| Flack parameter                                         | –                                                              | –                                                              | –                                                                      | 0.006(7)                                                                               | –                                                              |
| CCDC number                                             | 1952351                                                        | 1952352                                                        | 1952353                                                                | 1952354                                                                                | 1952355                                                        |

[a] As the crystal contains heavy disordered solvent molecules (chloroform and/or benzene), the squeeze algorithm of Olex2 was applied. Three phenyl groups were disordered in different ratios: (71:29), (59:41) and (59:41). All disordered phenyl groups were constrained to have idealised geometry (AFIX 66). Hydrogen atoms were taken into account using a riding model. [b] Hydrogen atoms bonded to nitrogen were refined isotropically, those ones bonded to carbon were taken into account using a riding model. On solvent benzene molecule was disordered in ration 53:47, both parts were constrained to an idealised hexagon. [c] Hydrogen atoms bonded to nitrogen were refined isotropically, those ones bonded to carbon were taken into account using a riding model. Approx. 5.6 molecules of acetonitrile were found per molecule. The occupation factors of these solvent molecules were refined, atoms of molecules with occupation below 25 % were refined isotropically, all others anisotropically. [d] Disordered CH<sub>2</sub>Cl<sub>2</sub> with non-integer number. [e] Highly disordered CH<sub>2</sub>Cl<sub>2</sub> was squeezed using the Olex2 routine. Bond lengths of hydrogens bonded to nitrogen were restrained with SADI to be equal. These hydrogens were refined isotropically.

## References

- 1 C. Reichardt, *Solvents and Solvent Effects in Organic Chemistry*, Wiley-VCH Publishers, 3rd ed., 2003.
- 2 O. V. Dolomanov, L. J. Bourhis, R. J. Gildea, J. A. K. Howard and H. Puschmann, *J. Appl. Cryst.* 2009, **42**, 339–341.
- 3 (a) G. M. Sheldrick, *Acta Crystallogr., Sect. A* 2008, **64**, 112–122, (b) G. M. Sheldrick, *Acta Crystallogr., Sect. A* 2015, **71**, 3–8.
- 4 G. M. Sheldrick, *Acta Crystallogr., Sect. C* 2015, **71**, 3–8.
